# Supplementary material for: Screening of Secondary Metabolites Produced by Nigrospora sphaerica Associated with the Invasive Weed Cenchrus ciliaris Reveals Two New Structurally Related Compounds
Source: MDPI journal article supplement (doi:10.3390/molecules29020438), 2024-01-16
Supplement: s1 [file s1]

# Screening of Secondary Metabolites Produced by *Nigrospora sphaerica* Associated with the Invasive Weed *Cenchrus ciliaris* Reveals Two New Structurally Related Compounds

Maria Michela Salvatore <sup>1,†</sup>, Maria Teresa Russo <sup>1,†</sup>, Susan Meyer <sup>2</sup>, Angela Tuzi <sup>1</sup>, Marina DellaGreca <sup>1</sup>, Marco Masi <sup>1,3,\*</sup> and Anna Andolfi <sup>1,3</sup>

<sup>1</sup> Department of Chemical Sciences, University of Naples Federico II, 80126 Naples, Italy; mariamichela.salvatore@unina.it (M.M.S.), mariateresa.russo2@unina.it (M.T.R.), angela.tuzi@unina.it (A.T.), dellagre@unina.it (M.DG.); andolfi@unina.it (A.A.);

<sup>2</sup> Department of Geosciences, Southern Utah University, Cedar City, UT 84721, USA; susanmeyer@suu.edu (S.M.)

<sup>3</sup> BAT Center-Interuniversity Center for Studies on Bioinspired Agro-Environmental Technology, University of Naples Federico II, 80055 Portici (NA), Italy

\* Correspondence: marco.masi@unina.it (M.M.)

† These authors contributed equally to this work.

**Abstract:** In the search for new alternative biocontrol strategies, phytopathogenic fungi could represent a new frontier for weed management. In this respect, as part of our ongoing work aiming at using fungal pathogens as alternative to common herbicides, the foliar pathogen *Nigrospora sphaerica* has been evaluated to control buffelgrass (*Cenchrus ciliaris*). In particular, in this work the isolation and structural elucidation of two new biosynthetically related metabolites, named nigrosphaeritriol (3-(hydroxymethyl)-2-methylpentane-1,4-diol) and nigrosphaerilactol (3-(1-hydroxyethyl)-4-methyltetrahydrofuran-2-ol), from the phytotoxic culture filtrate extract were described, along with the identification of several known metabolites. Moreover, the absolute stereochemistry of (3R,4S,5S)-nigrosphaerilactone, previously reported as (3S,4R,5R)-4-hydroxymethyl-3,5-dimethyldihydro-2-furanone, was determined for the first time by X-ray diffraction analysis. Considering their structural relationship, the determination of the absolute stereochemistry of nigrosphaerilactone allowed us to hypothesize the absolute stereochemistry of nigrosphaeritriol and nigrosphaerilactol.

**Keywords:** Specialized Metabolites; Buffelgrass; Phytopathogen; Bioherbicide; Metabolomics.

## Contents

**Figure S1.** HR-ESI-MS spectrum of nigrosphaeritriol (**1**) recorded in positive modality.

**Figure S2.** <sup>13</sup>C NMR spectrum of nigrosphaeritriol (**1**) recorded at 100 MHz in CD<sub>3</sub>OD.

**Figure S3.** <sup>1</sup>H NMR spectrum of nigrosphaeritriol (**1**) recorded at 400 MHz in CD<sub>3</sub>OD.

**Figure S4.** COSY spectrum of nigrosphaeritriol (**1**) recorded at 400 MHz in CD<sub>3</sub>OD.

**Figure S5.** HSQC spectrum of nigrosphaeritriol (**1**) recorded at 400 MHz in CD<sub>3</sub>OD.

**Figure S6.** HMBC spectrum of nigrosphaeritriol (**1**) recorded at 400 MHz in CD<sub>3</sub>OD.

**Figure S7.** GC-MS analysis of purified chromatographic fraction containing nigrosphaeritriol (**1**) after trimethylsilylation with BSTFA: A) Total ion chromatogram and B) EI mass spectrum at 70 eV extracted at 10.557 min (RI = 1515). TMS = trimethylsilyl group.

---

**Figure S8.**  $^1\text{H}$  NMR spectrum of 1,1',4-*O,O',O''*-triacetylnigrosphaerilactol (**17**), recorded at 400 MHz in  $\text{CDCl}_3$ .

**Figure S9.** GC-MS analysis of purified chromatographic fraction containing nigrosphaeritriol (**1**) after acetylation (1,1',4-*O,O',O''*-triacetylnigrosphaerilactol (**16**)): A) Total ion chromatogram and B) EI mass spectrum at 70 eV extracted at 11.786 min (RI = 1671). Ac = acetyl group.

**Figure S10.** HR-ESI-MS spectrum of nigrosphaerilactol (**2**) recorded in positive modality.

**Figure S11.**  $^1\text{H}$  NMR spectrum of nigrosphaerilactol (**2**) recorded at 500 MHz in  $\text{CDCl}_3$ .

**Figure S12.** HSQC spectrum of nigrosphaerilactol (**2**) recorded at 500 MHz in  $\text{CDCl}_3$ .

**Figure S13.**  $^{13}\text{C}$  NMR spectrum of nigrosphaerilactol (**2**) recorded at 100 MHz in  $\text{CDCl}_3$ .

**Figure S14.** COSY spectrum of nigrosphaerilactol (**2**) recorded at 500 MHz in  $\text{CDCl}_3$ .

**Figure S15.** HMBC spectrum of nigrosphaerilactol (**2**) recorded at 500 MHz in  $\text{CDCl}_3$ .

**Figure S16.** NOESY spectrum of nigrosphaerilactol (**2**) recorded at 500 MHz in  $\text{CDCl}_3$ .

**Figure S17.**  $^1\text{H}$  NMR spectrum of 2,6-*O,O'*-diacetylnigrosphaerilactol (**17**) recorded at 400 MHz in  $\text{CDCl}_3$ .

**Figure S18.** COSY spectrum of 2,6-*O,O'*-diacetylnigrosphaerilactol (**17**) recorded at 400 MHz in  $\text{CDCl}_3$ .

**Figure S19.** GC-MS analysis of purified chromatographic fraction containing nigrosphaerilactol (**2**) after trimethylsilylation with BSTFA: A) Total ion chromatogram; B) EI mass spectrum at 70 eV extracted at 8.516 min (RI = 1346); C) EI mass spectrum at 70 eV extracted at 8.969 min (RI = 1381). TMS = trimethylsilyl group.

**Figure S20.** GC-MS analysis of purified chromatographic fraction containing nigrosphaerilactol (**2**) after acetylation (2,6-*O,O'*-diacetylnigrosphaerilactol, **17**): A) Total ion chromatogram and B) EI mass spectrum at 70 eV extracted at 9.939 min (RI = 1459). Ac = acetyl group.

**Figure S21.**  $^1\text{H}$  NMR spectrum of nigrosphaerilactone (**3**) recorded at 400 MHz in  $\text{CDCl}_3$ .

**Figure S22.**  $^1\text{H}$  NMR spectrum of 8-*O-p*-bromobenzoylnigrosphaerilactone (**18**) recorded at 400 MHz in  $\text{CDCl}_3$ .

**Figure S23.** GC-MS analysis of purified chromatographic fraction containing nigrosphaerilactone (**2**) with *p*-bromobenzoyl chloride giving 8-*O-p*-bromobenzoylnigrosphaerilactone (**18**): A) Total ion chromatogram and B) EI mass spectrum at 70 eV extracted at 14.662 min (RI = 2348).

**Table S1.** Crystal data and structure refinement for 8-*O-p*-bromobenzoylnigrosphaerilactone (**18**).

**Table S2.** Selected bond lengths and angles with standard deviations for 8-*O-p*-bromobenzoylnigrosphaerilactone (**18**).

**Table S3.** Hydrogen bonds for 8-*O-p*-bromobenzoylnigrosphaerilactone (**18**).

**Figure S24.** Perspective view of the molecule in the edge of phenyl plane in the Capped Sticks style (up) and Spacefill style (down) showing flat elongated shape of the molecule.

**Figure S25.** Crystal packing viewed along **b** axis showing waved sheets of molecules. Contacts shorter than the sum of vdW radii are drawn as cyan and red dashed lines.

**Figure S26.**  $^1\text{H}$  NMR spectrum of (*S*)-hydroxybutyrolactone (**4**) recorded at 400 MHz in  $\text{CDCl}_3$ .

**Figure S27.**  $^1\text{H}$  NMR spectrum of lupinlactone (**5**) recorded at 400 MHz in  $\text{CDCl}_3$ .

**Figure S28.**  $^1\text{H}$  NMR spectrum of nigrosporione A (**6**) recorded at 400 MHz in  $\text{CDCl}_3$ .

**Figure S29.**  $^1\text{H}$  NMR spectrum of 2,4-dihydroxy-6-methoxyacetophenone (**7**) recorded at 400 MHz in  $\text{CD}_3\text{OD}$ .

**Figure S30.**  $^1\text{H}$  NMR spectrum of tyrosol (**8**) recorded at 400 MHz in  $\text{CD}_3\text{OD}$ .

---

**Figure S31.** EI mass spectrum at 70 eV of 4-hydroxyphenylacetic acid (**9**), 2TMS (RI = 1581). TMS = trimethylsilyl group.

**Figure S32.** EI mass spectrum at 70 eV of adenosine (**10**), 4TMS (RI = 2670). TMS = trimethylsilyl group.

**Figure S33.** EI mass spectrum at 70 eV of uridine (**11**), 3TMS (RI = 2496). TMS = trimethylsilyl group.

**Figure S34.** EI mass spectrum at 70 eV of ribo-hexonic acid 3-deoxy- $\gamma$ -lactone (**12**), 3TMS (RI = 1795). TMS = trimethylsilyl group.

**Figure S35.** EI mass spectrum at 70 eV of levoglucosan (**13**), 3TMS (RI = 1726). TMS = trimethylsilyl group.

**Figure S36.** EI mass spectrum at 70 eV of 3-hydroxyisobutyric acid (**14**), 2TMS (RI = 1167). TMS = trimethylsilyl group.

**Figure S37.** EI mass spectrum at 70 eV of ergosta-7,22-dien-3-ol (**15**), TMS (RI = 2589). TMS = trimethylsilyl group.

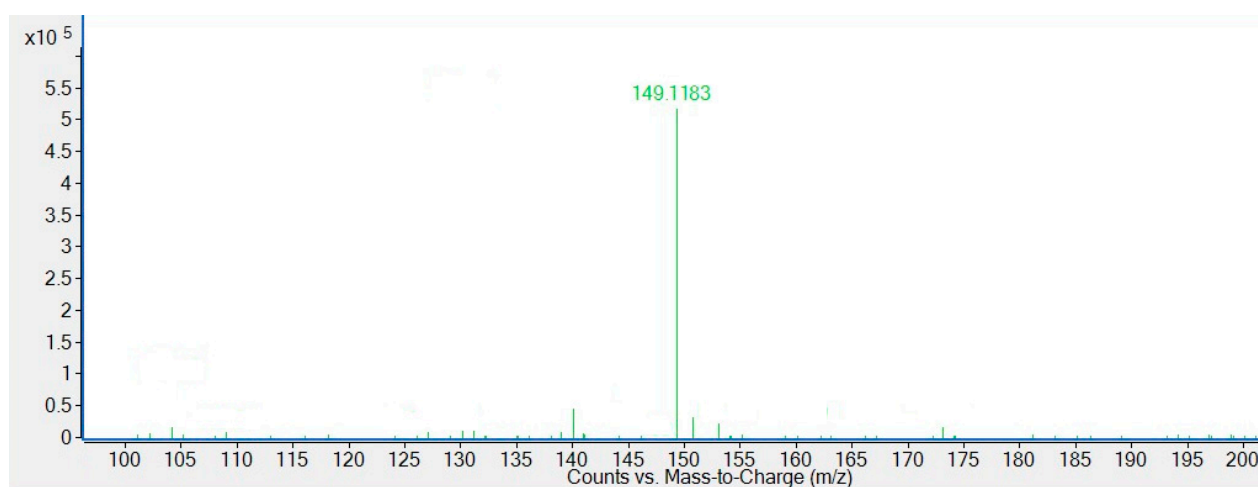

**Figure S1.** HR-ESI-MS spectrum of nigrosphaeritriol (**1**) recorded in positive modality.

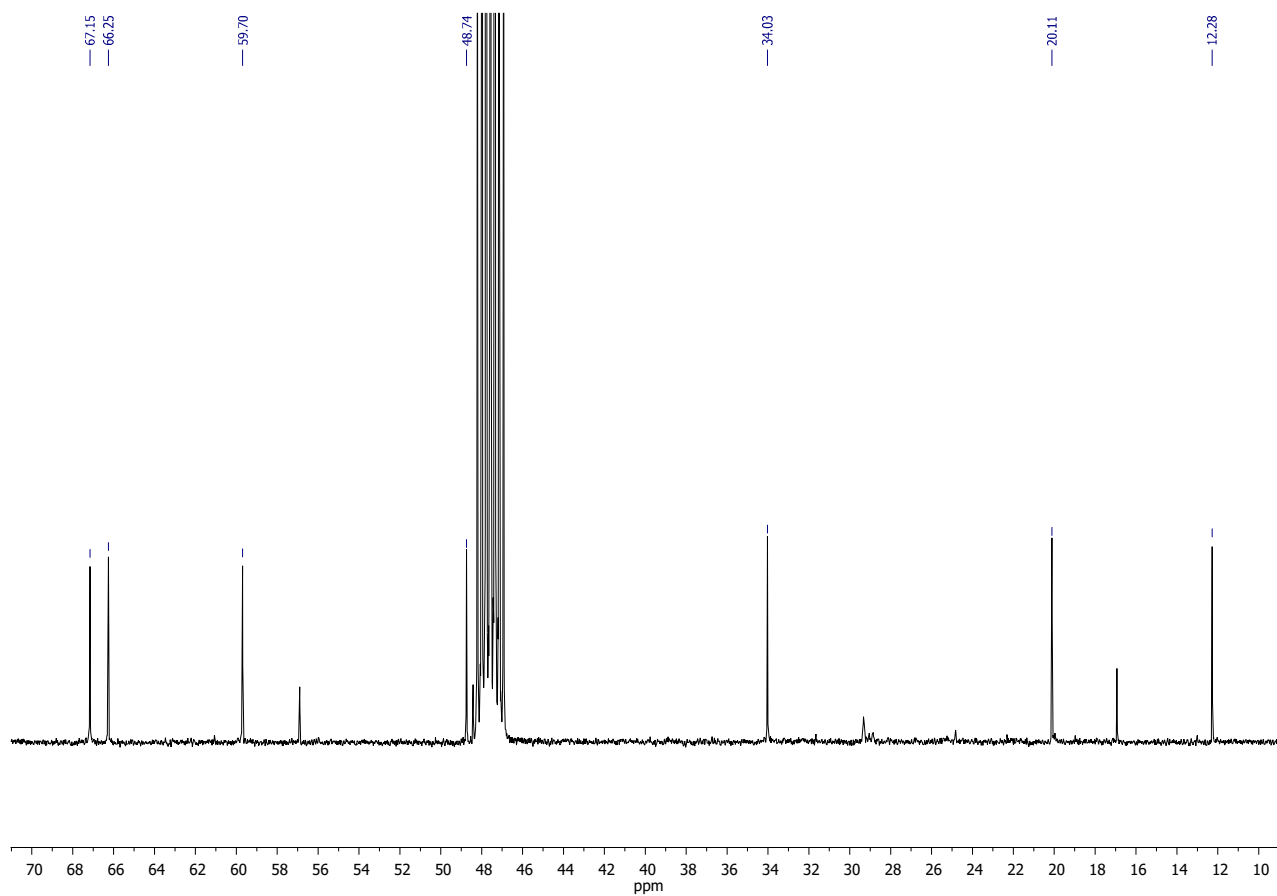

**Figure S2.**  $^{13}\text{C}$  NMR spectrum of nigrosphaeritriol (**1**) recorded at 100 MHz in  $\text{CD}_3\text{OD}$ .

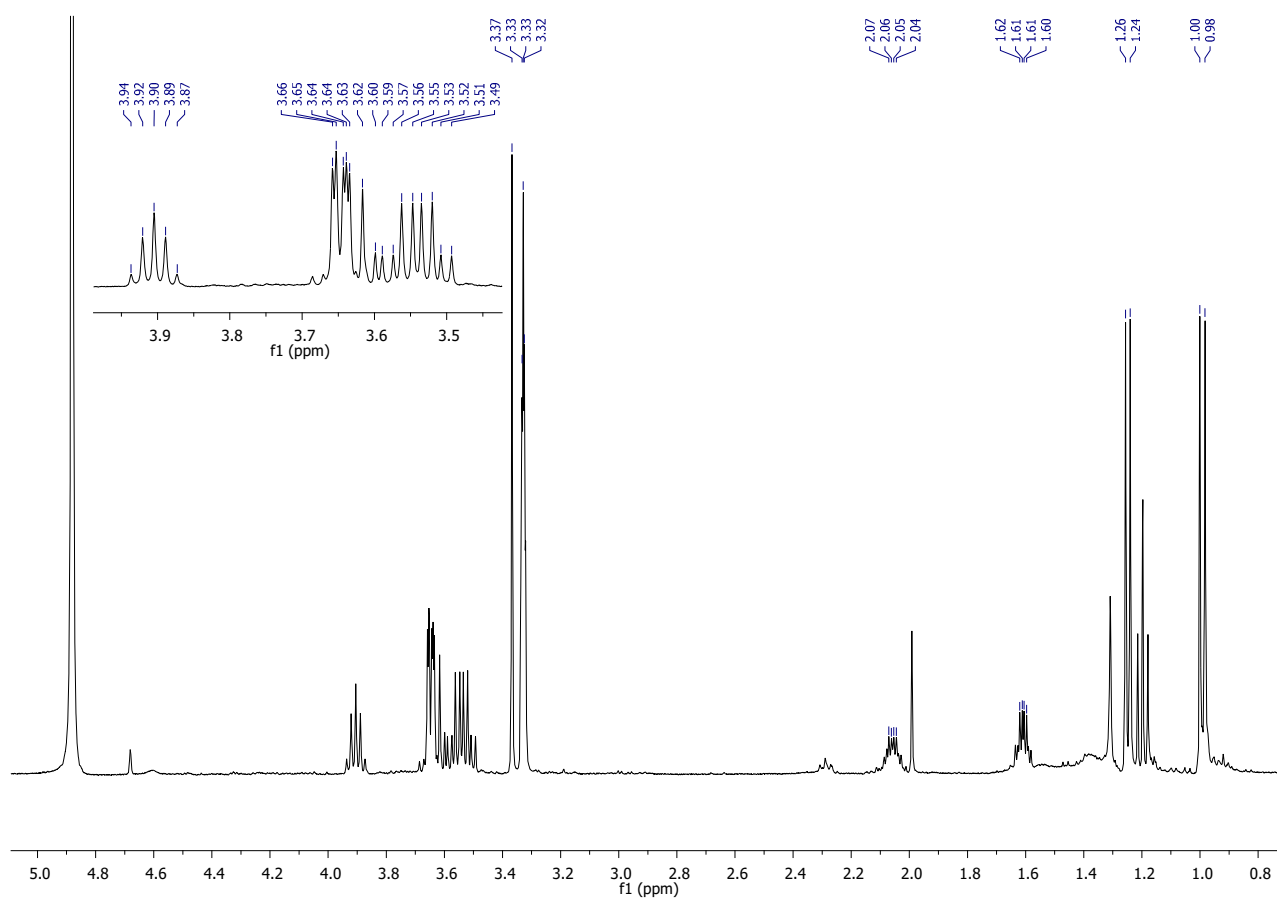

**Figure S3.**  $^1\text{H}$  NMR spectrum of nigrosphaeritriol (1) recorded at 400 MHz in  $\text{CD}_3\text{OD}$ .

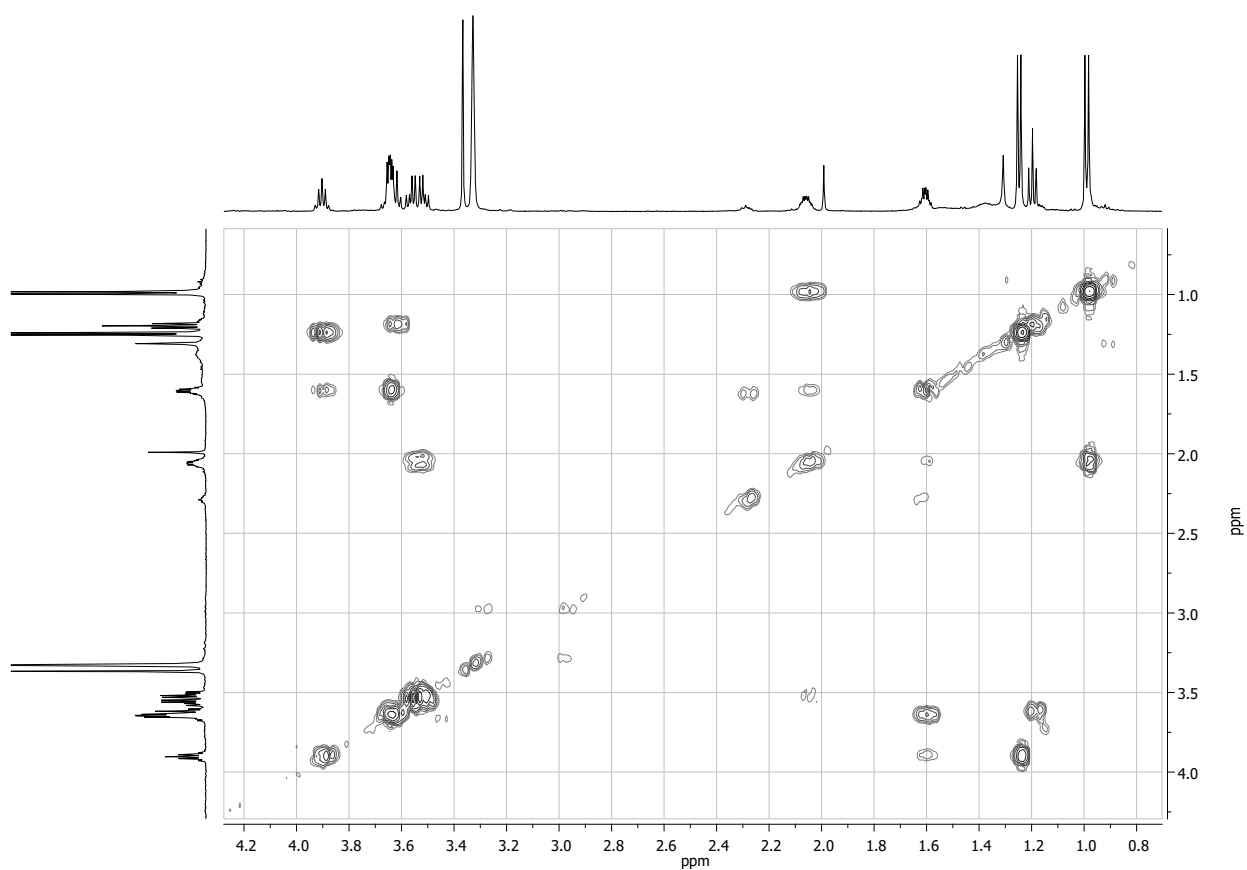

**Figure S4.** COSY spectrum of nigrosphaeritriol (**1**) recorded at 400 MHz in CD<sub>3</sub>OD.

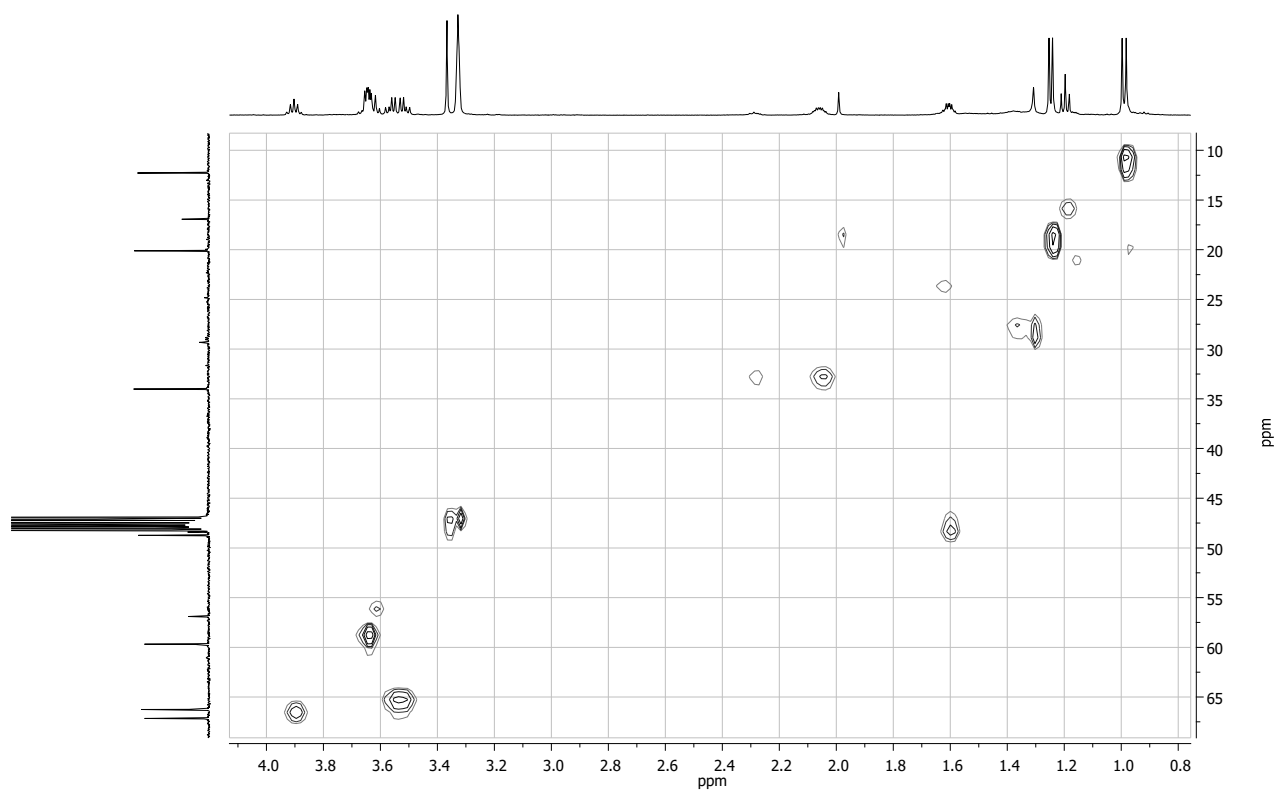

**Figure S5.** HSQC spectrum of nigrosphaeritriol (**1**) recorded at 400 MHz in CD<sub>3</sub>OD.

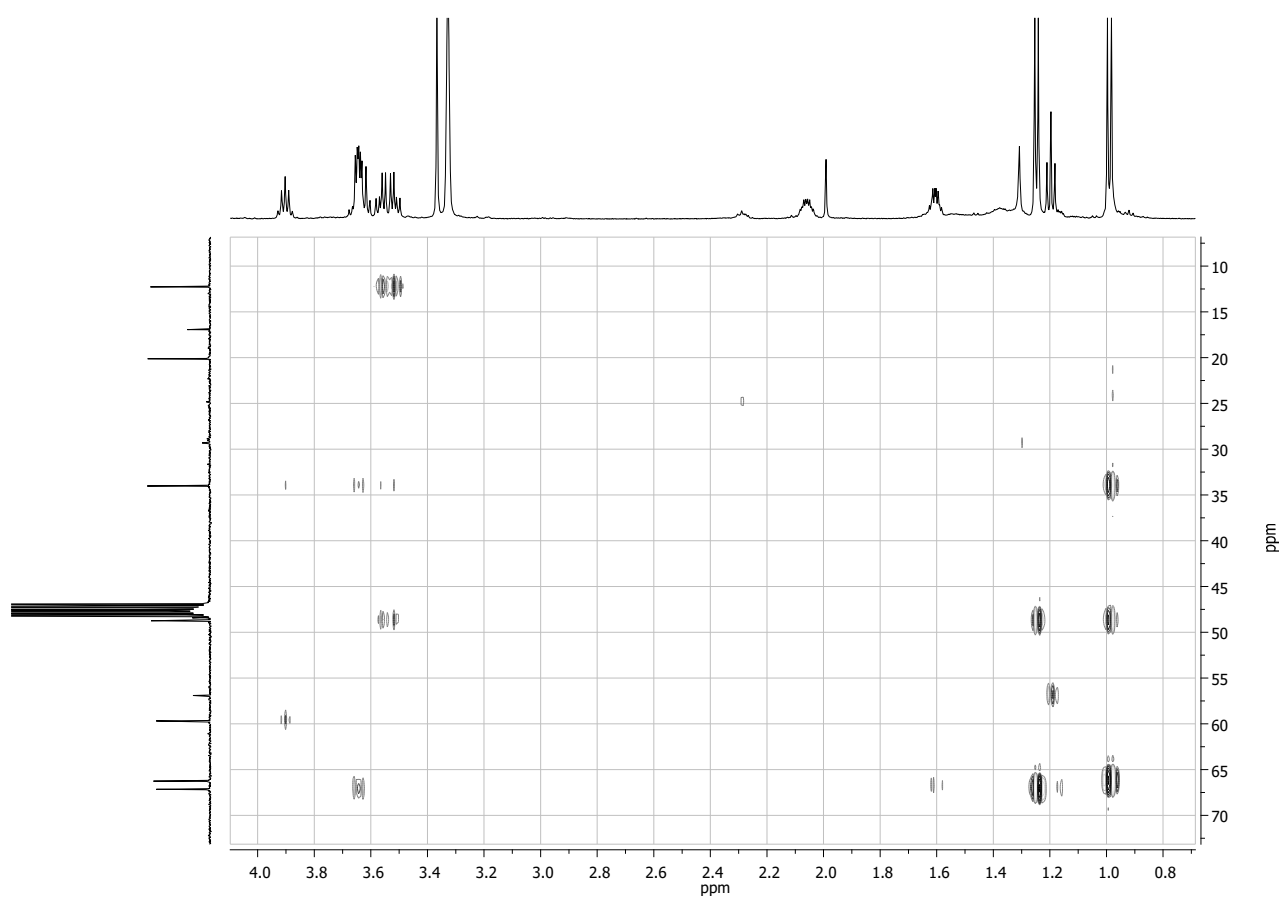

**Figure S6.** HMBC spectrum of nigrosphaeritriol (**1**) recorded at 400 MHz in  $\text{CD}_3\text{OD}$ .

The chromatogram displays Abundance on the y-axis (ranging from 0 to 6e+07) and Time (min) on the x-axis (ranging from 0 to 20.00). A single, sharp, prominent peak is observed at 10.563 minutes, reaching an abundance of approximately 6e+07. Minor baseline noise and very small peaks are visible throughout the run, particularly around 14.00 minutes.

Scan 1101 (10.557 min)

Abundance

CC(C)(C(=O)O[Si](C)(C)C)C(C)C(C)O[Si](C)(C)C

Mass spectrum showing relative abundance (Y-axis, 0 to 8,000,000) versus  $m/z$  (X-axis, 0 to 500). The base peak is at  $m/z$  73. Other significant peaks are labeled at  $m/z$  45, 95, 117, 147, 184, 217, 238, 259, 291, 317, and 341.

**Figure S7.** GC-MS analysis of purified chromatographic fraction containing nigrosphaeritriol (**1**) after trimethylsilylation with BSTFA: A) Total ion chromatogram and B) EI mass spectrum at 70 eV extracted at 10.557 min (RI = 1515). TMS = trimethylsilyl group.

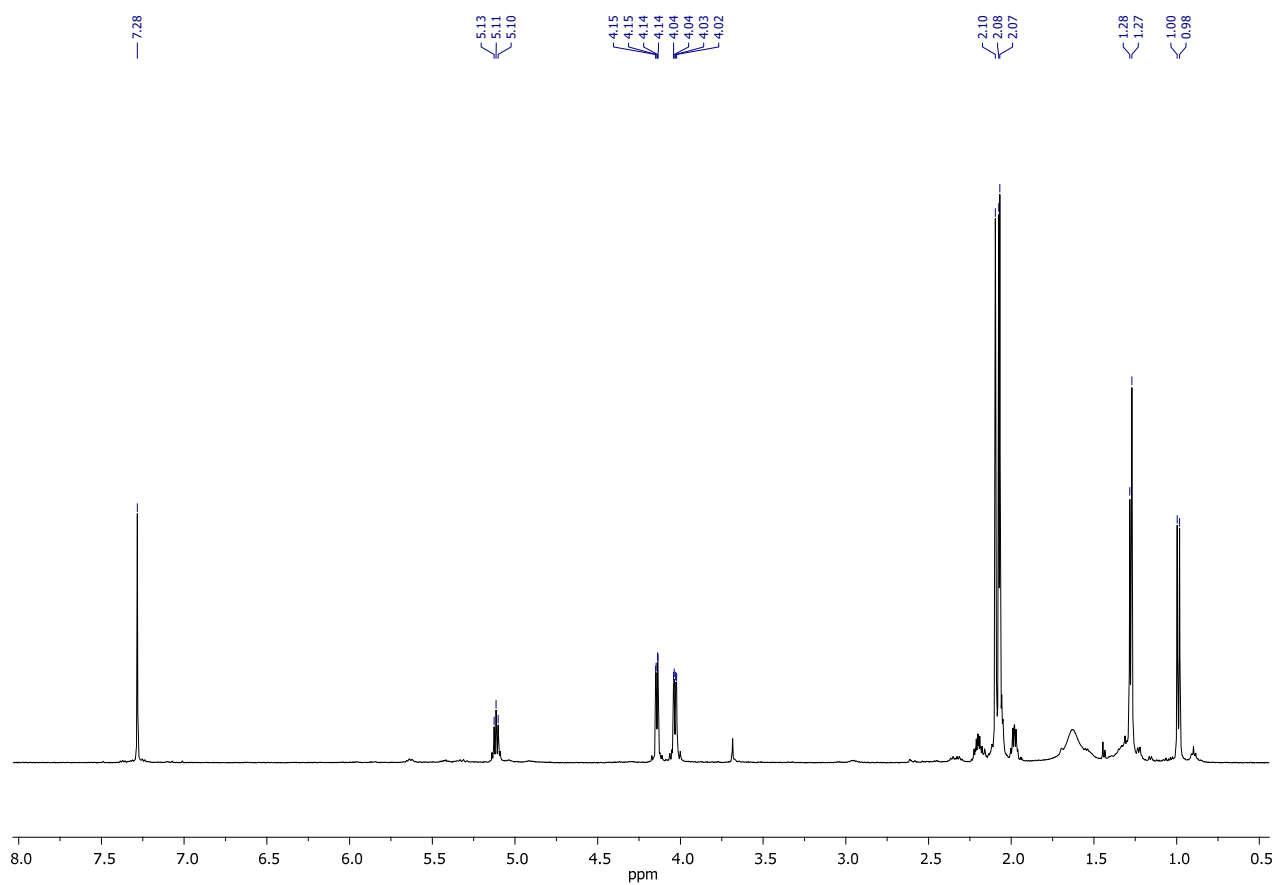

**Figure S8.**  $^1\text{H}$  NMR spectrum of 1,1',4-O',O''-triacetylnigrosphaerilactol (**17**), recorded at 400 MHz in  $\text{CDCl}_3$ .



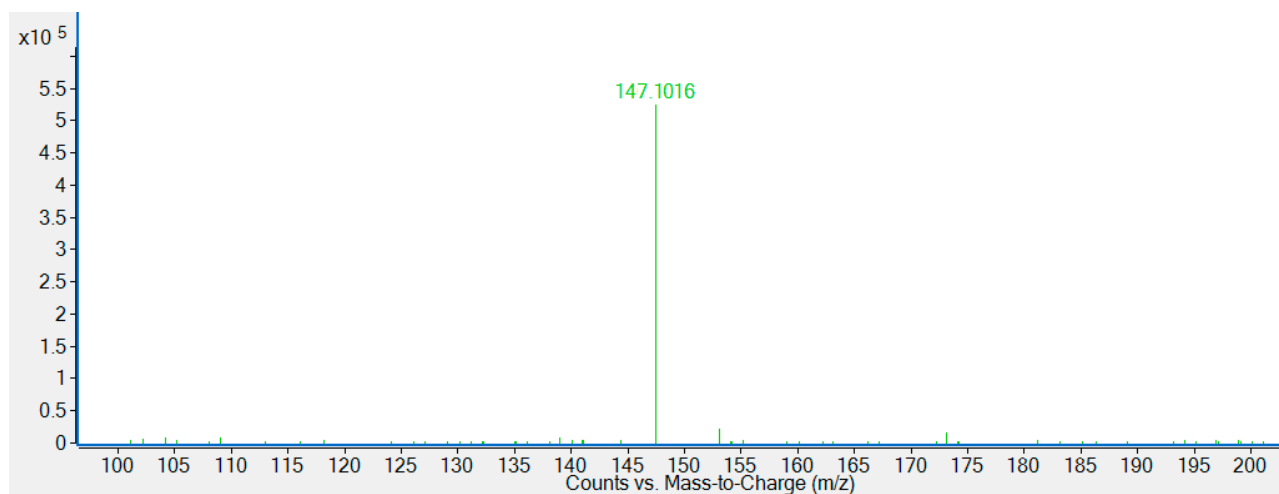

**Figure S10.** HR-ESI-MS spectrum of nigrosphaerilactol (2) recorded in positive modality.

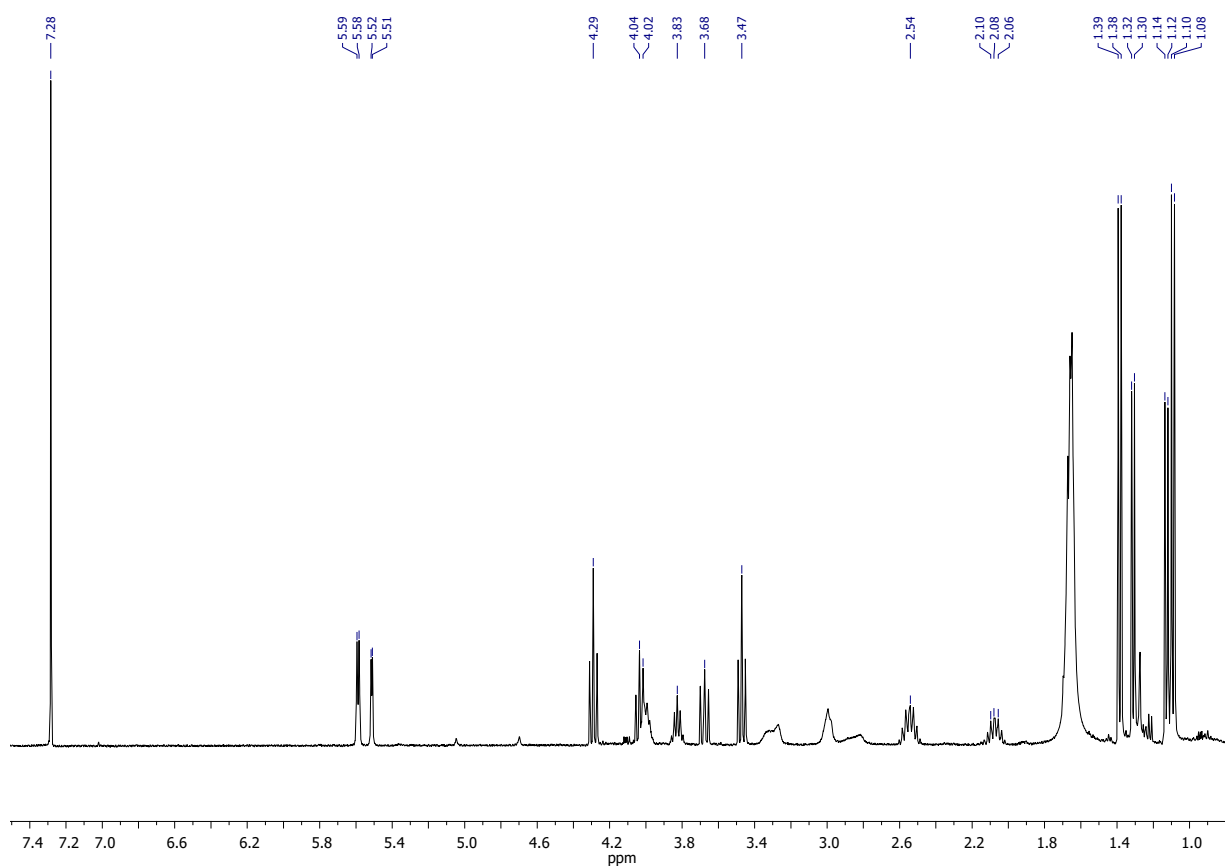

**Figure S11.**  $^1\text{H}$  NMR spectrum of nigrosphaerilactol (2) recorded at 500 MHz in  $\text{CDCl}_3$ .

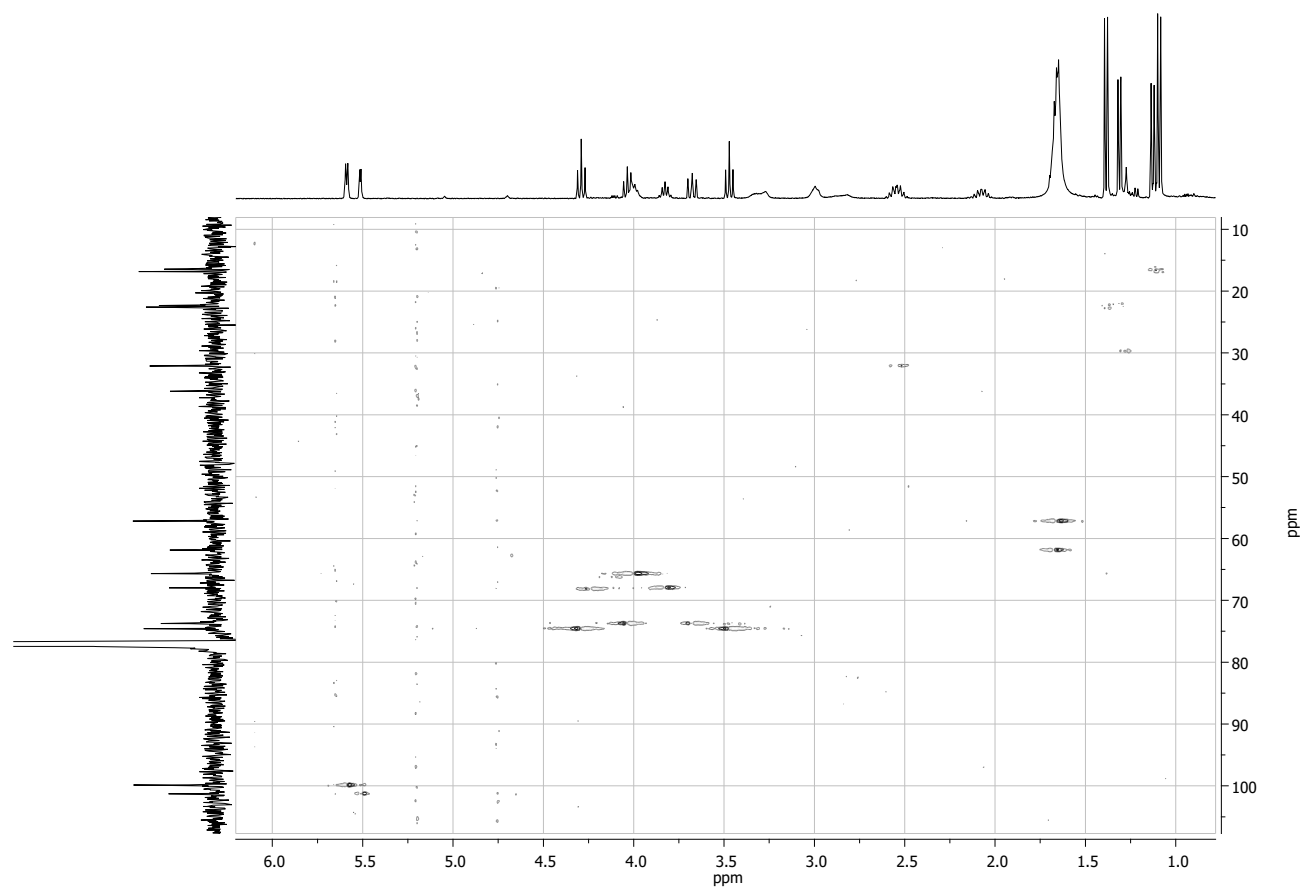

**Figure S12.** HSQC spectrum of nigrosphaerilactol (**2**) recorded at 500 MHz in  $\text{CDCl}_3$ .

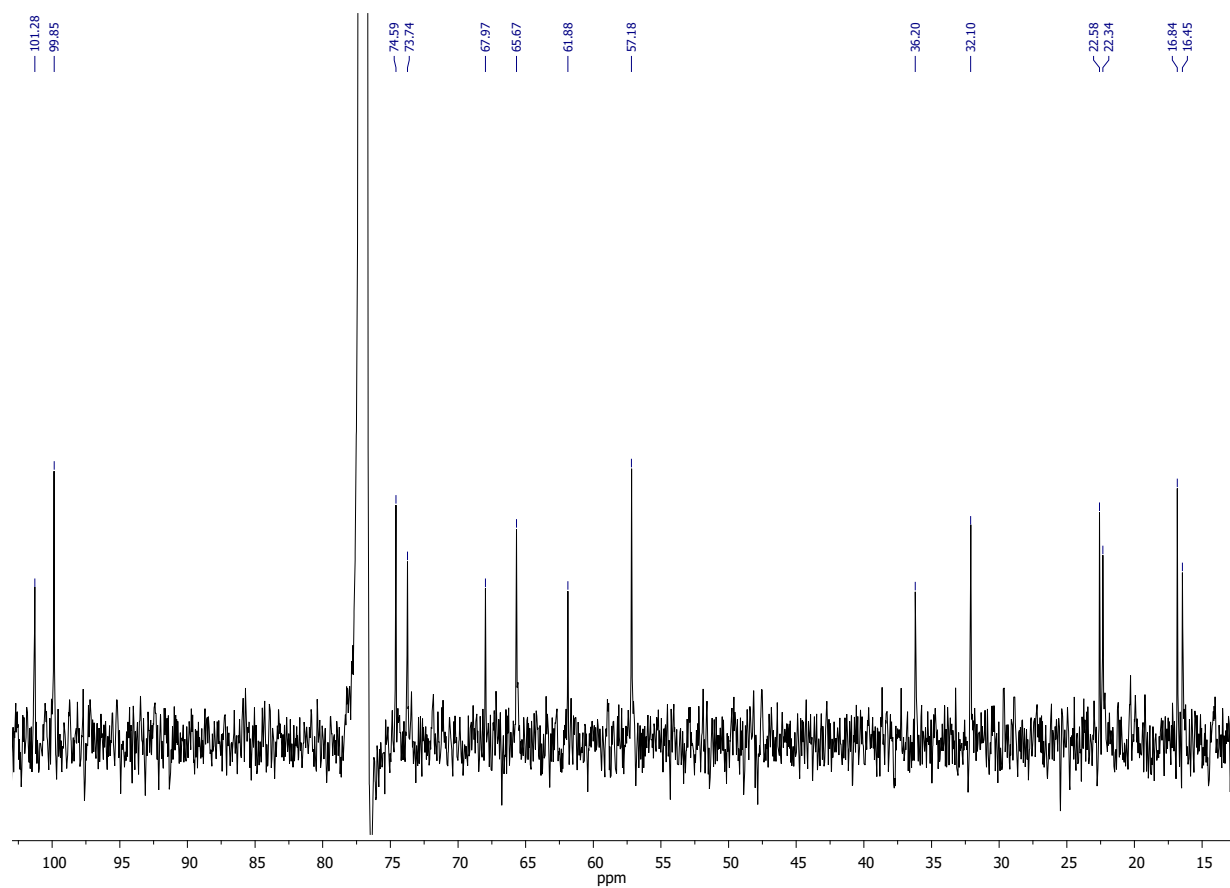

**Figure S13.**  $^{13}\text{C}$  NMR spectrum of nigrosphaerilactol (**2**) recorded at 100 MHz in  $\text{CDCl}_3$ .

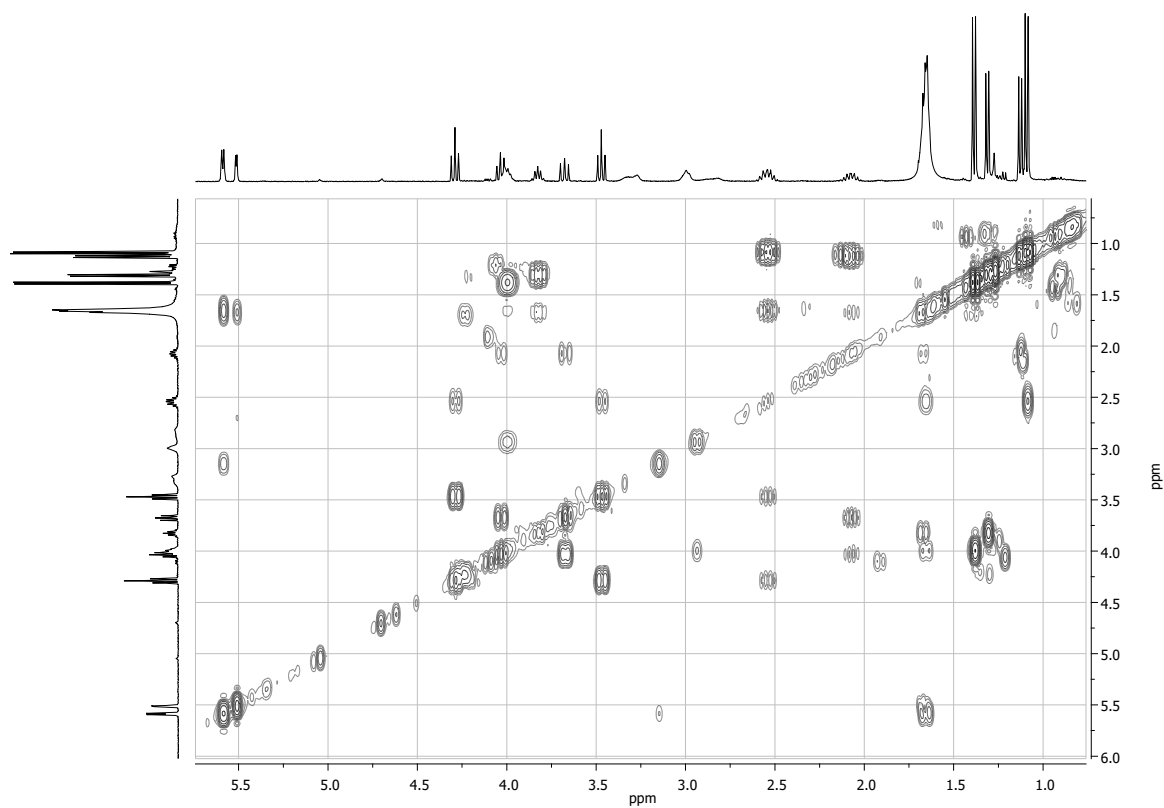

**Figure S14.** COSY spectrum of nigrosphaerilactol (**2**) recorded at 500 MHz in CDCl<sub>3</sub>.

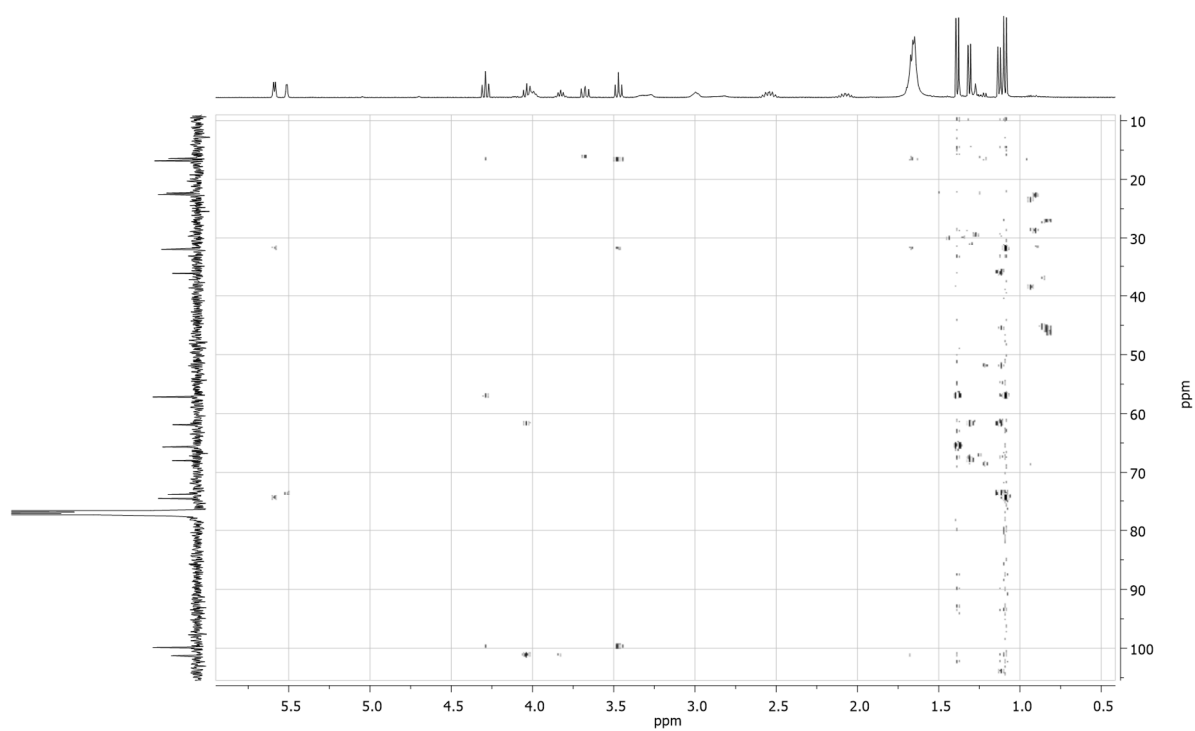

**Figure S15.** HMBC spectrum of nigrosphaerilactol (**2**) recorded at 500 MHz in CDCl<sub>3</sub>.

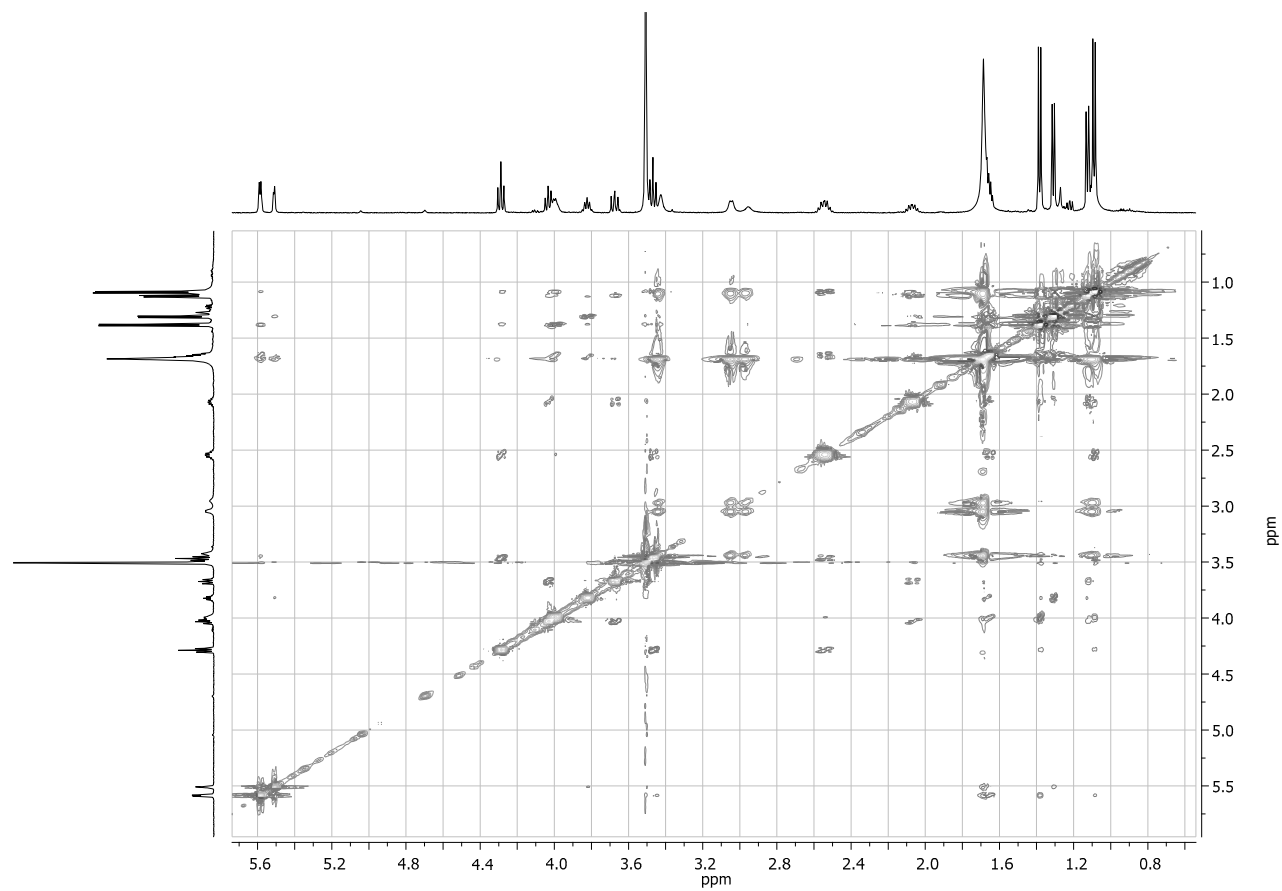

**Figure S16.** NOESY spectrum of nigrosphaerilactol (**2**) recorded at 500 MHz in CDCl<sub>3</sub>.

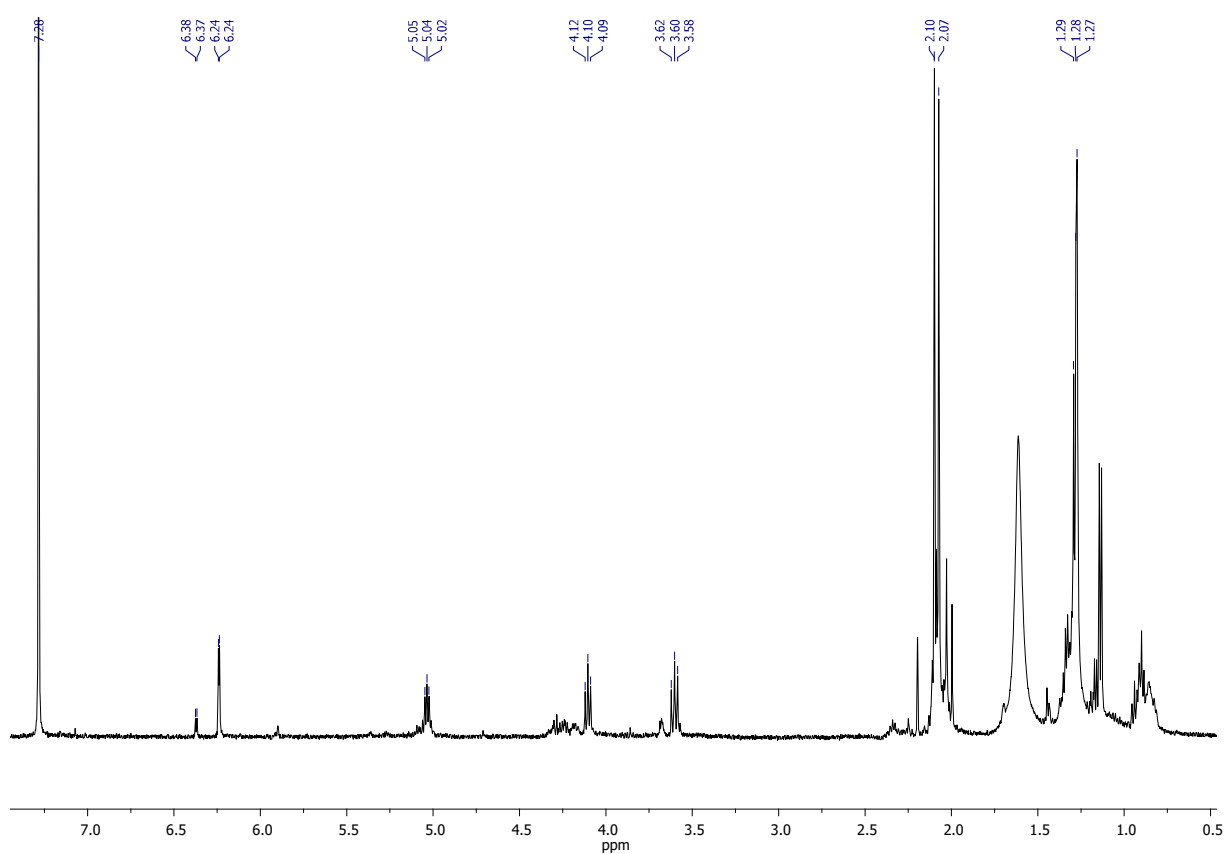

**Figure S17.**  $^1\text{H}$  NMR spectrum of 2,6-*O,O*-diacetylnigrosphaerilactol (**17**) recorded at 400 MHz in  $\text{CDCl}_3$ .

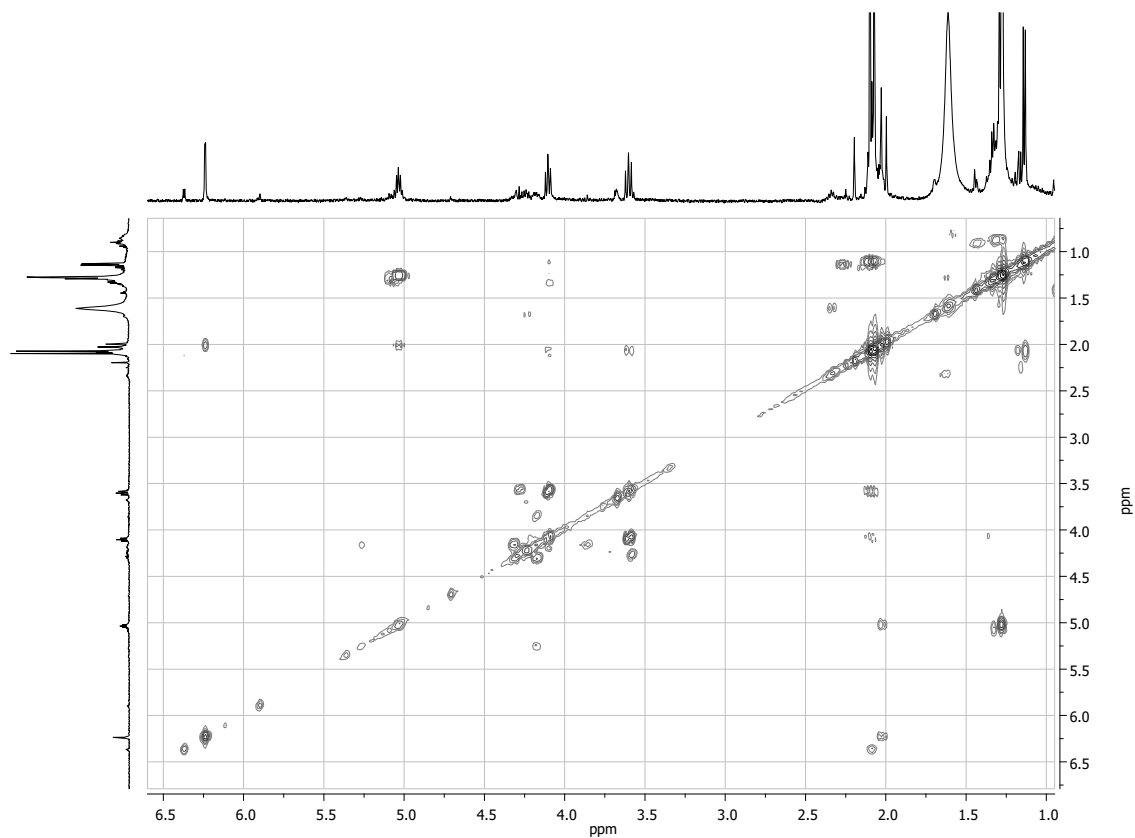

**Figure S18.** COSY spectrum of 2,6-*O,O*-diacetylnigrosphaerilactol (**17**) recorded at 400 MHz in  $\text{CDCl}_3$ .

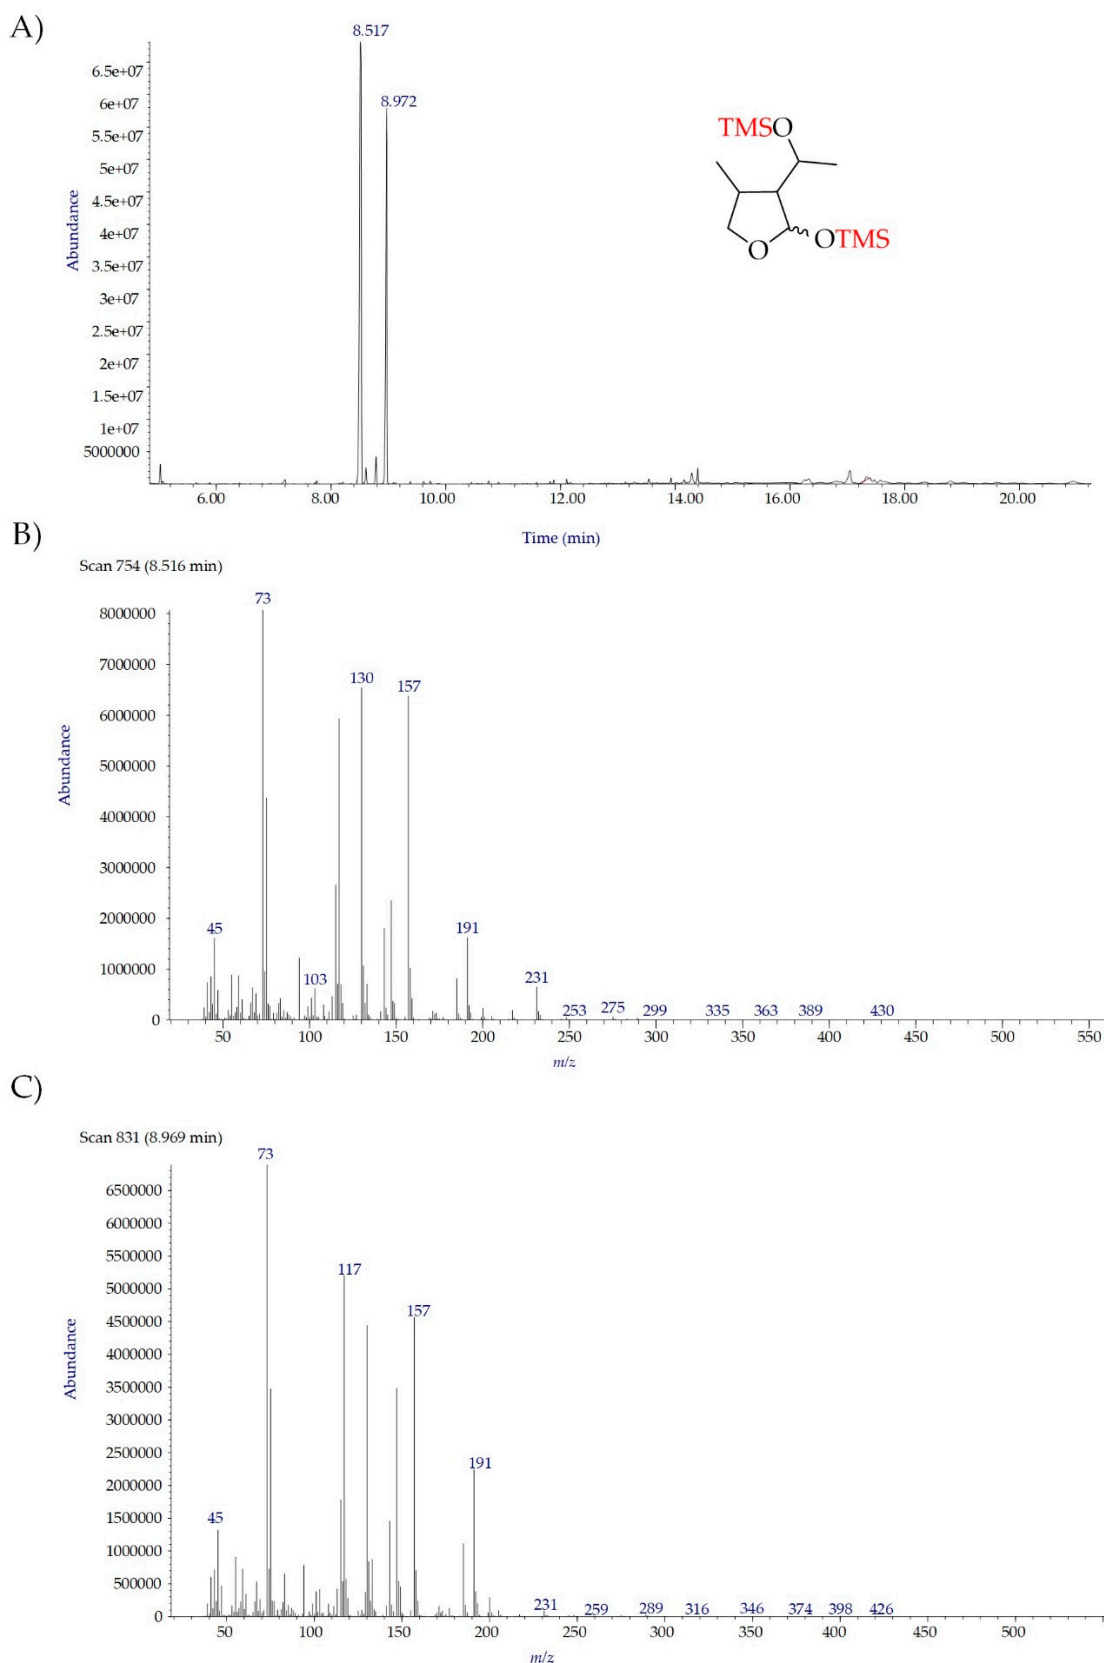

**Figure S19.** GC-MS analysis of purified chromatographic fraction containing nigrosphaerilactol (**2**) after trimethylsilylation with BSTFA: A) Total ion chromatogram; B) EI mass spectrum at 70 eV extracted at 8.516 min (RI =1346); C) EI mass spectrum at 70 eV extracted at 8.969 min (RI = 1381). TMS = trimethylsilyl group.

A)

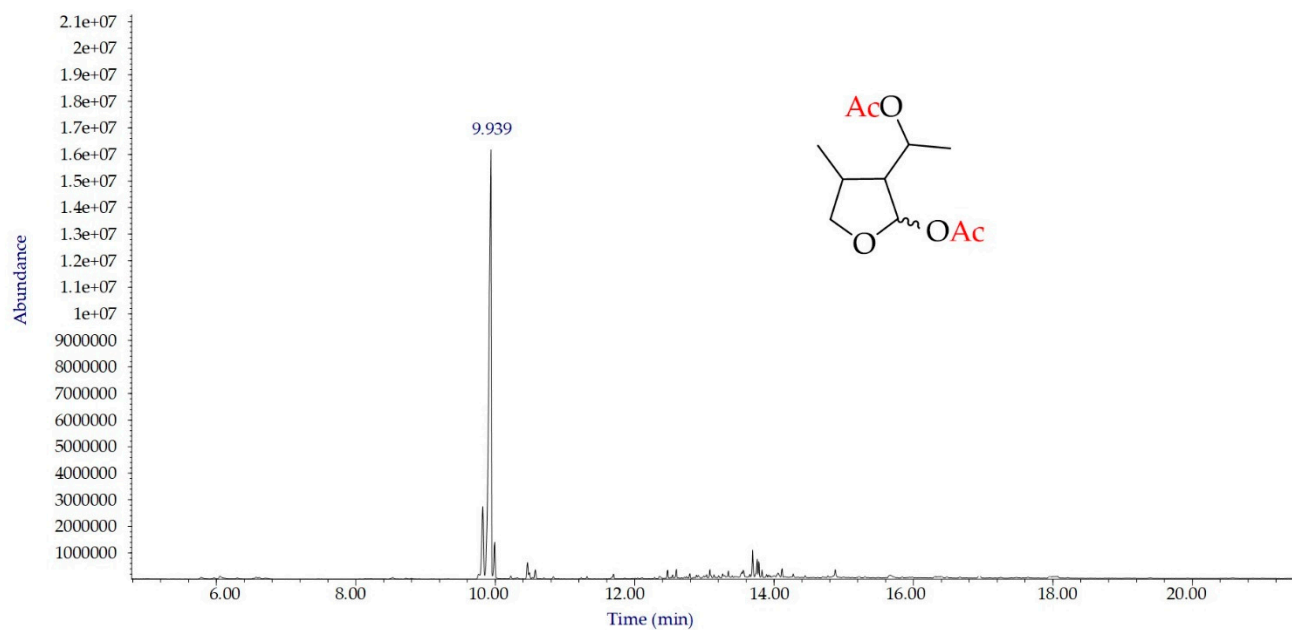

B)

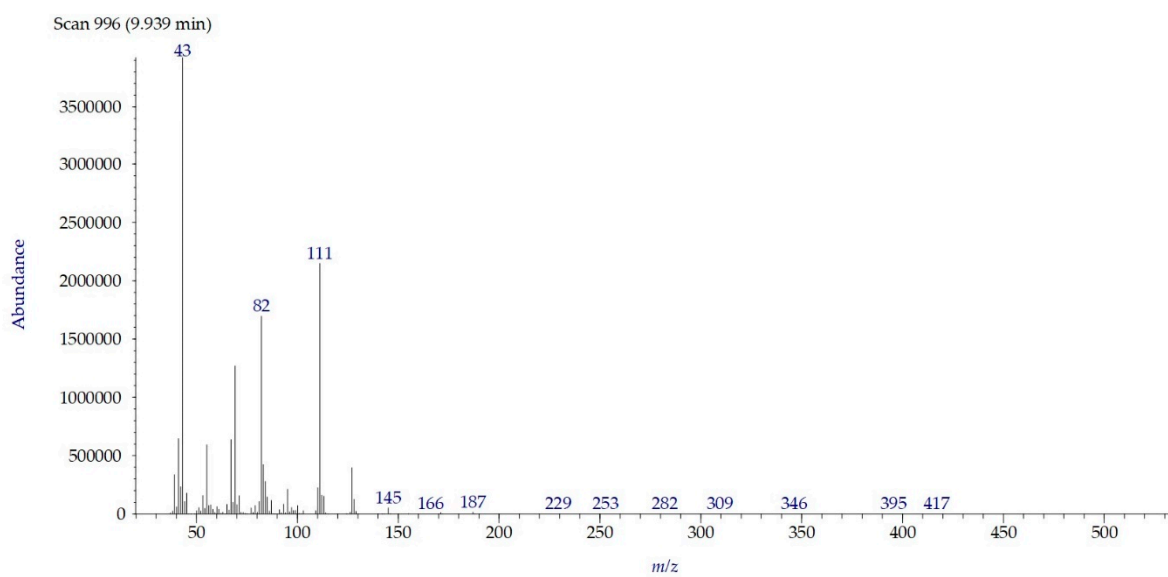

**Figure S20.** GC-MS analysis of purified chromatographic fraction containing nigrosphaerilactol (**2**) after acetylation (2,6-*O,O'*-diacetylnigrosphaerilactol, **17**): A) Total ion chromatogram and B) EI mass spectrum at 70 eV extracted at 9.939 min (RI = 1459). Ac = acetyl group.

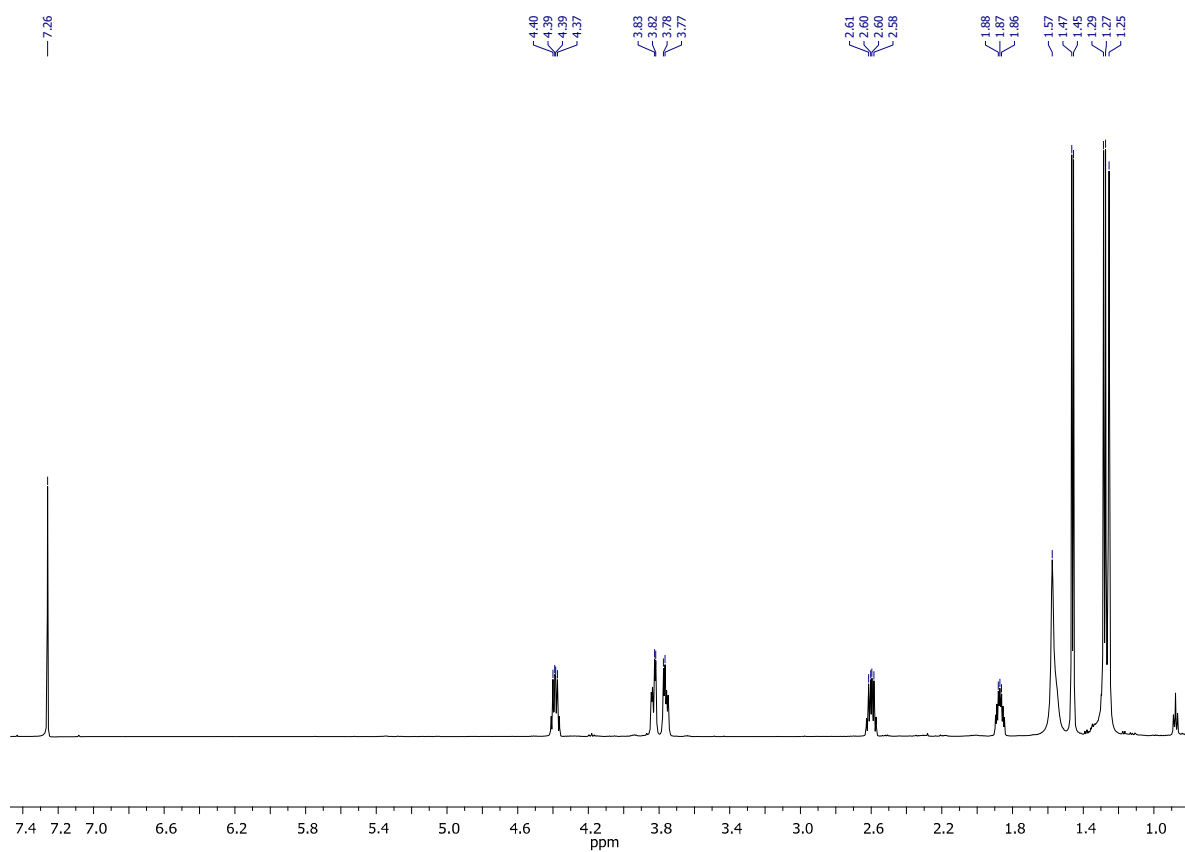

**Figure S21.**  $^1\text{H}$  NMR spectrum of nigrosphaerilactone (3) recorded at 400 MHz in  $\text{CDCl}_3$ .

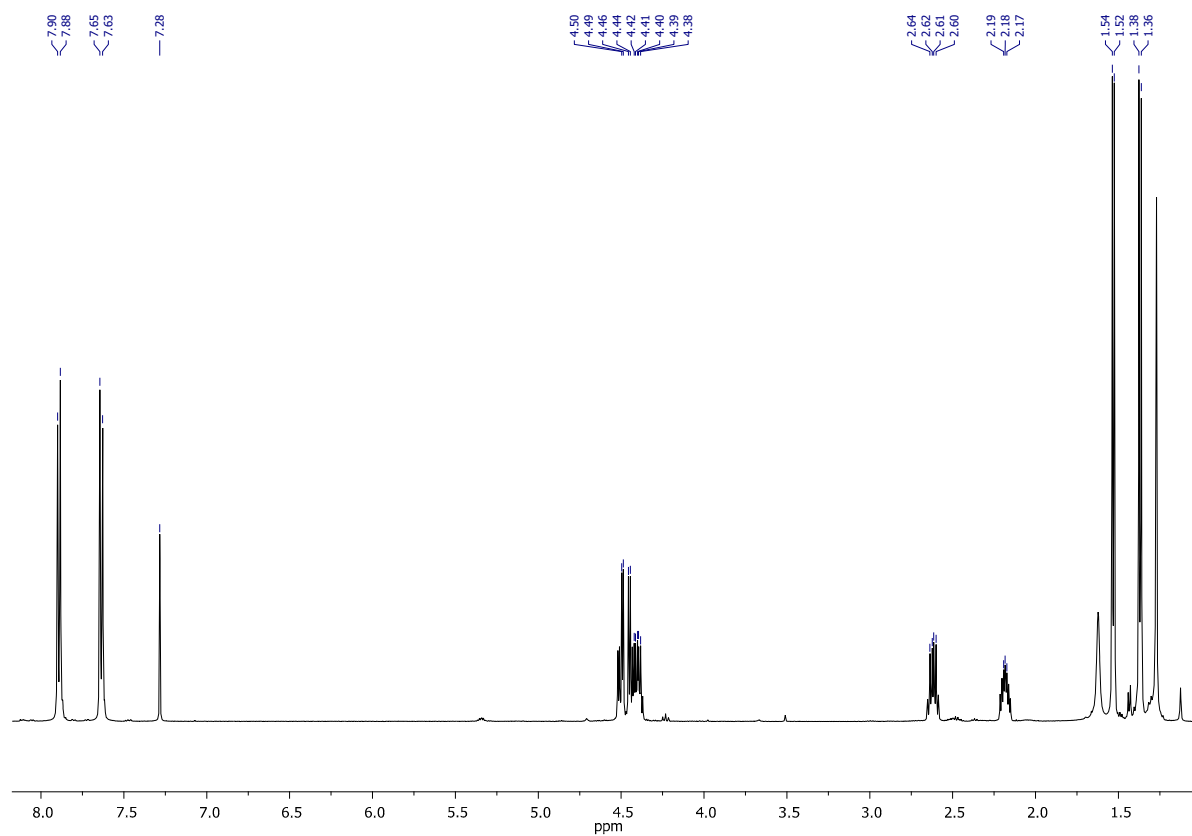

**Figure S22.** <sup>1</sup>H NMR spectrum of 8-*O*-*p*-bromobenzoylnigrosphaerilactone (**18**) recorded at 400 MHz in CDCl<sub>3</sub>.

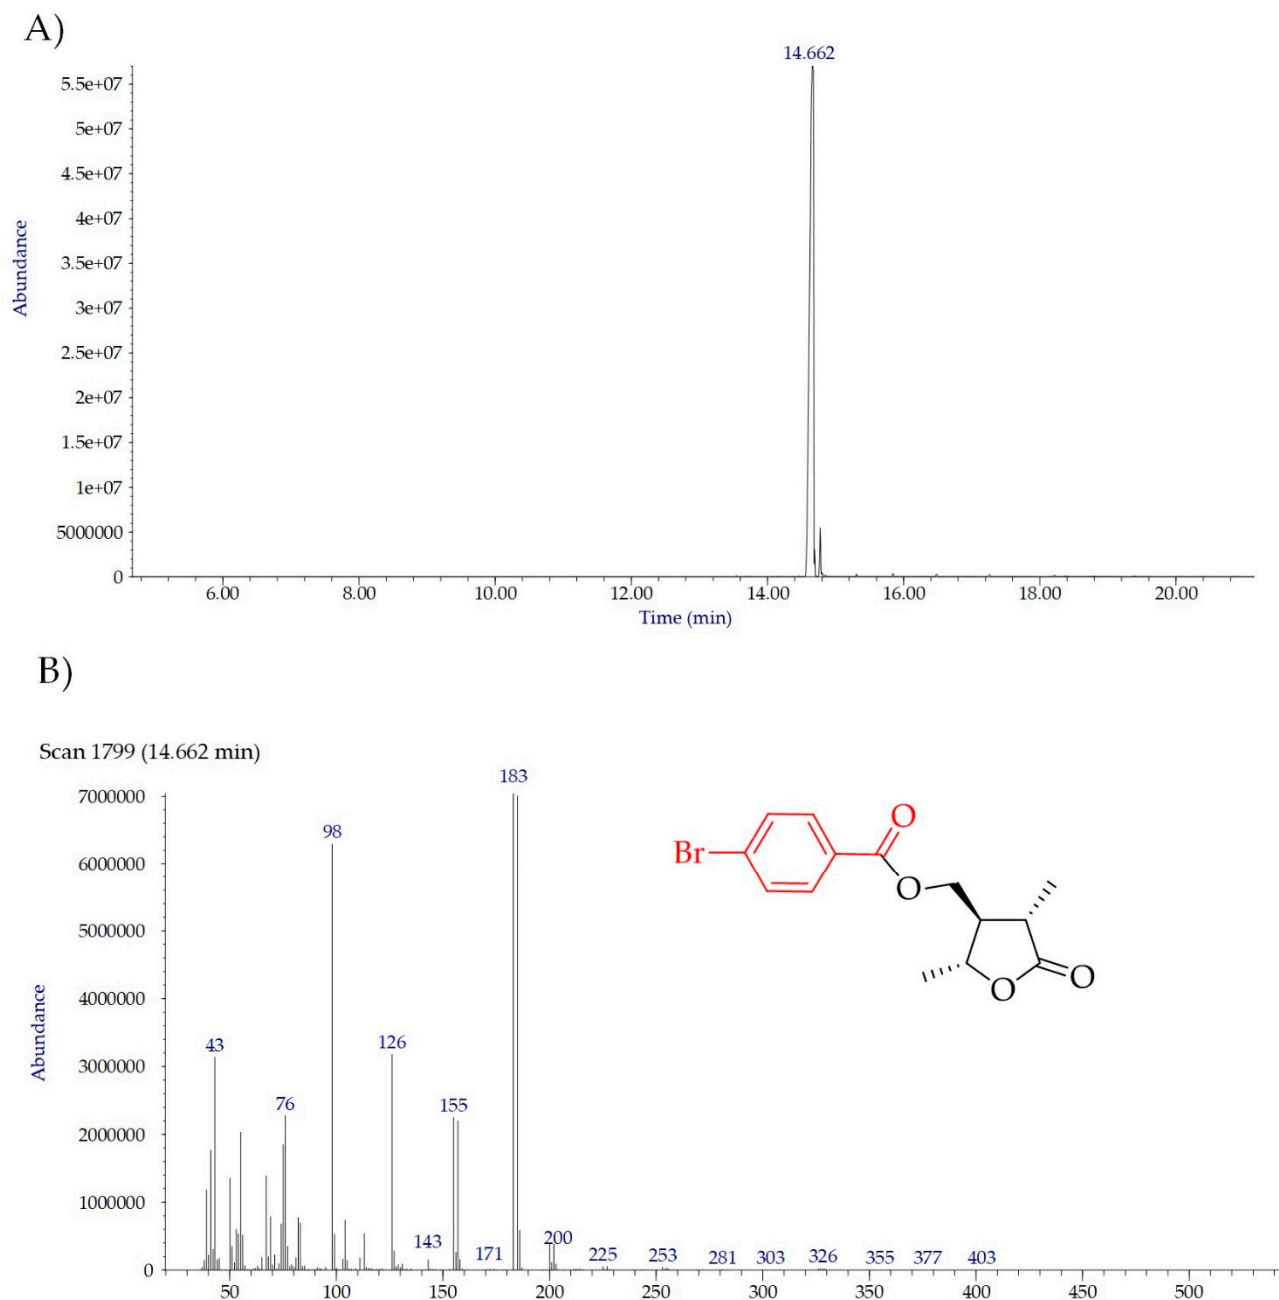

**Figure S23.** GC-MS analysis of purified chromatographic fraction containing nigrosphaerilactone (2) with *p*-bromobenzoyl chloride giving 8-*O*-*p*-bromobenzoynigrosphaerilactone (18): A) Total ion chromatogram and B) EI mass spectrum at 70 eV extracted at 14.662 min (RI = 2348).

**Table S1.** Crystal data and structure refinement for 8-*O*-*p*-bromobenzoynigrosphaerilactone (18). Crystallographic data for the structure have also been deposited with the Cambridge Crystallographic Data Centre as supplementary publication number CCDC 2322188.

|                             |                                                    |
|-----------------------------|----------------------------------------------------|
| Empirical formula           | C <sub>14</sub> H <sub>15</sub> Br O <sub>4</sub>  |
| Formula weight              | 327.17                                             |
| Temperature                 | 298(2) K                                           |
| Wavelength                  | 0.71073 Å                                          |
| Crystal system, space group | Orthorhombic, P 21 21 21                           |
| Unit cell dimensions        | a = 7.3450(6) Å α = 90°<br>b = 11.486(2) Å β = 90° |

|                                      |                                                                  |
|--------------------------------------|------------------------------------------------------------------|
|                                      | $c = 16.5930(19)\text{\AA}$ $\gamma = 90^\circ$                  |
| Volume                               | $1399.9(3)\text{\AA}^3$                                          |
| Z, Calculated density                | 4, $1.552\text{ Mg/m}^3$                                         |
| Absorption coefficient               | $2.943\text{mm}^{-1}$                                            |
| F(000)                               | 664                                                              |
| Crystal size                         | $0.350 \times 0.250 \times 0.200\text{mm}$                       |
| Theta range for data collection      | $3.029$ to $27.503^\circ$                                        |
| Limiting indices                     | $-9 \leq h \leq 7$ , $-14 \leq k \leq 14$ , $-19 \leq l \leq 21$ |
| Reflections collected / unique       | 7875 / 3100 [R(int) = 0.0716]                                    |
| Completeness to theta                | $=25.186$ to $99.2\%$                                            |
| Refinement method                    | Full-matrix least-squares on $F^2$                               |
| Data / restraints / parameters       | 3100 / 0 / 174                                                   |
| Goodness-of-fit on $F^2$             | 1.070                                                            |
| Final R indices [ $I > 2\sigma(I)$ ] | $R1 = 0.0465$ , $wR2 = 0.0721$                                   |
| R indices (all data)                 | $R1 = 0.1170$ , $wR2 = 0.0933$                                   |
| Absolute structure parameter         | $0.071(13)$                                                      |
| Extinction coefficient               | n/a                                                              |
| Largest diff. peak and hole          | $0.369$ and $-0.519\text{ e \AA}^{-3}$                           |

**Table S2.** Selected bond lengths and angles with standard deviations for 8-*O-p*-bromobenzoylnigrosphaerilactone (**18**).

|                       |             |
|-----------------------|-------------|
| O(1)-C(2)             | 1.341(9)    |
| C(1)-C(5)             | 1.468(8)    |
| O(2)-C(2)             | 1.199(9)    |
| O(3)-C(8)             | 1.441(7)    |
| O(3)-C(9)             | 1.336(7)    |
| O(4)-C(9)             | 1.204(7)    |
| Br(1)-C(13)           | 1.880(7)    |
| C(4)-C(8)-O(3)-C(9)   | $167.2(5)$  |
| C(8)-O(3)-C(9)-C(10)  | $-178.4(5)$ |
| O(3)-C(9)-C(10)-C(11) | $176.3(7)$  |

**Table S3.** Hydrogen bonds for 8-*O-p*-bromobenzoylnigrosphaerilactone (**18**).

| D-H...A              | d(D-H) | d(H...A) | d(D...A) | $\angle(\text{DHA})$ |
|----------------------|--------|----------|----------|----------------------|
| C(12)-H(12)...O(1)#1 | 0.93   | 2.53     | 3.324(8) | 143.9                |
| C(6)-H(6B)...O(3)    | 0.96   | 2.65     | 3.223(8) | 118.4                |

---

Symmetry transformations used to generate equivalent atoms: #1  $x, y+1, z$

---

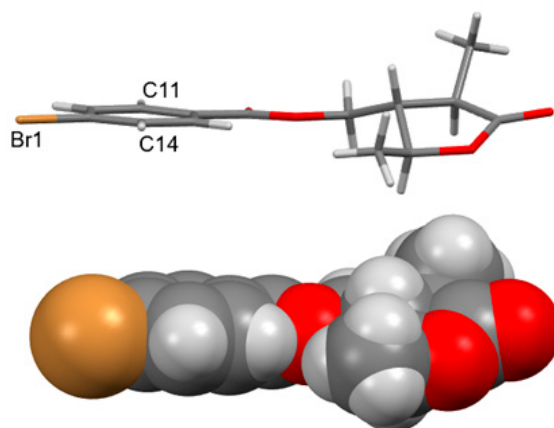

**Figure S24.** Perspective view of the molecule in the edge of phenyl plane in the Capped Sticks style (up) and Spacefill style (down) showing flat elongated shape of the molecule.

---

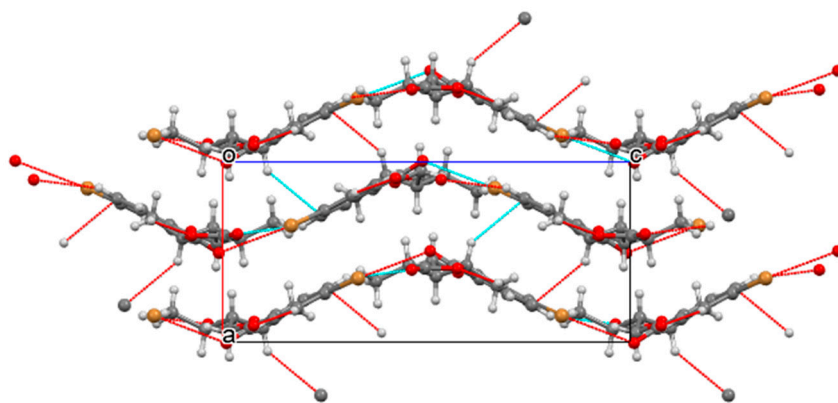

**Figure S25.** Crystal packing viewed along **b** axis showing waved sheets of molecules. Contacts shorter than the sum of vdW radii are drawn as cyan and red dashed lines.

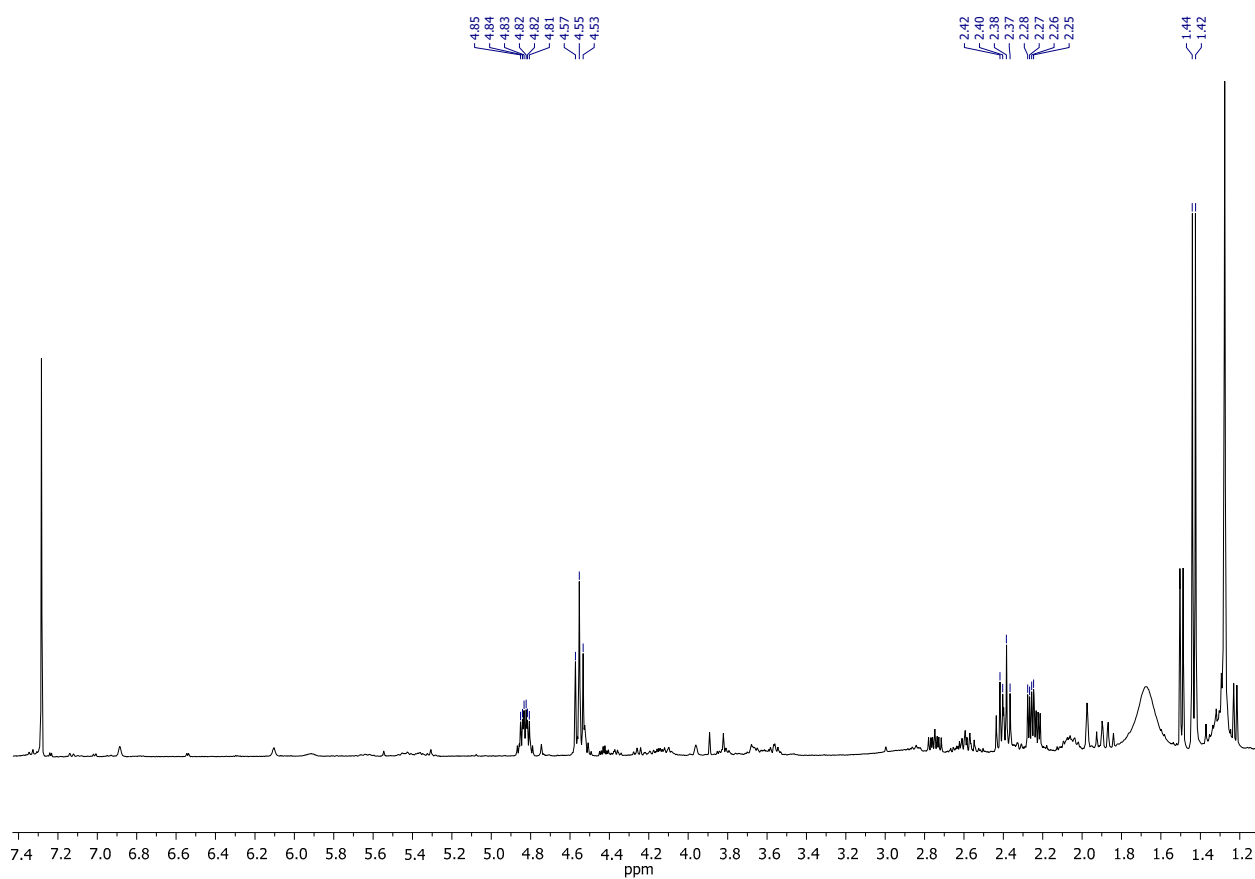

**Figure S26.**  $^1\text{H}$  NMR spectrum of (*S*)-hydroxybutyrolactone (**4**) recorded at 400 MHz in  $\text{CDCl}_3$ .

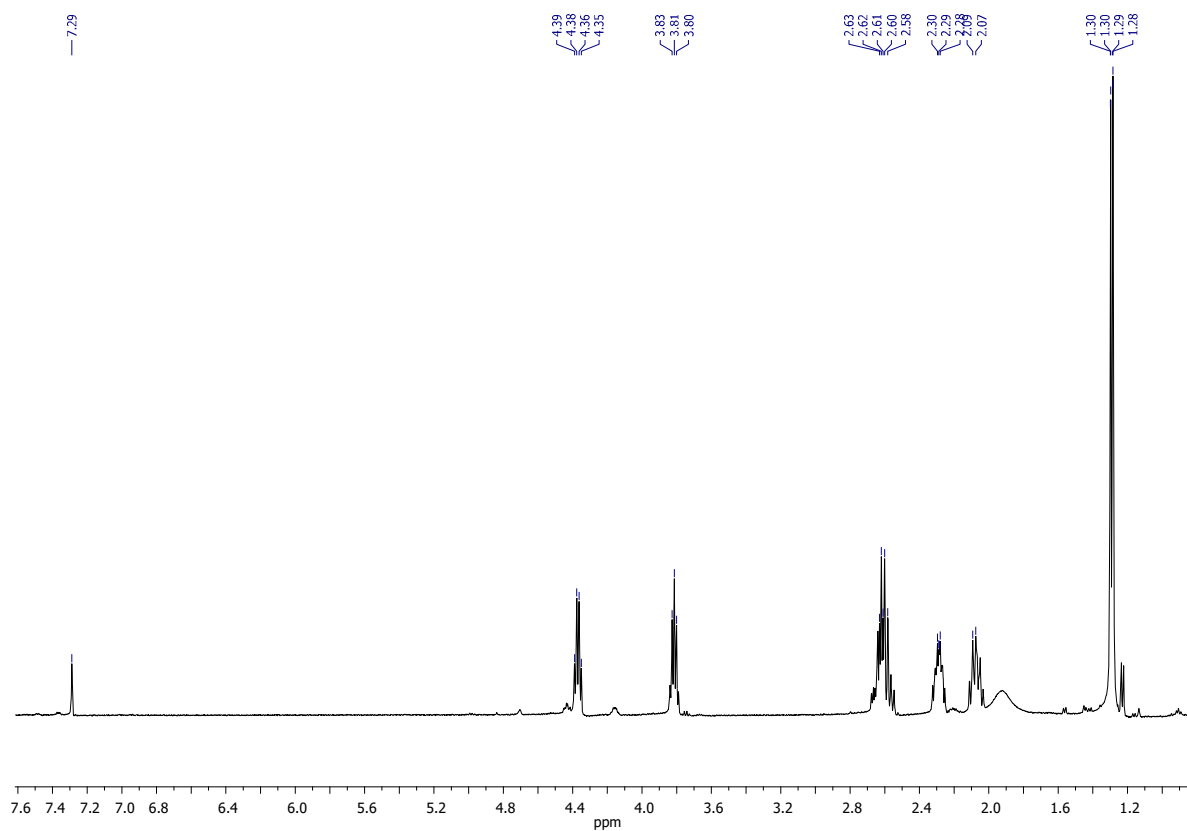

**Figure S27.** <sup>1</sup>H NMR spectrum of lupinlactone (5) recorded at 400 MHz in CDCl<sub>3</sub>.

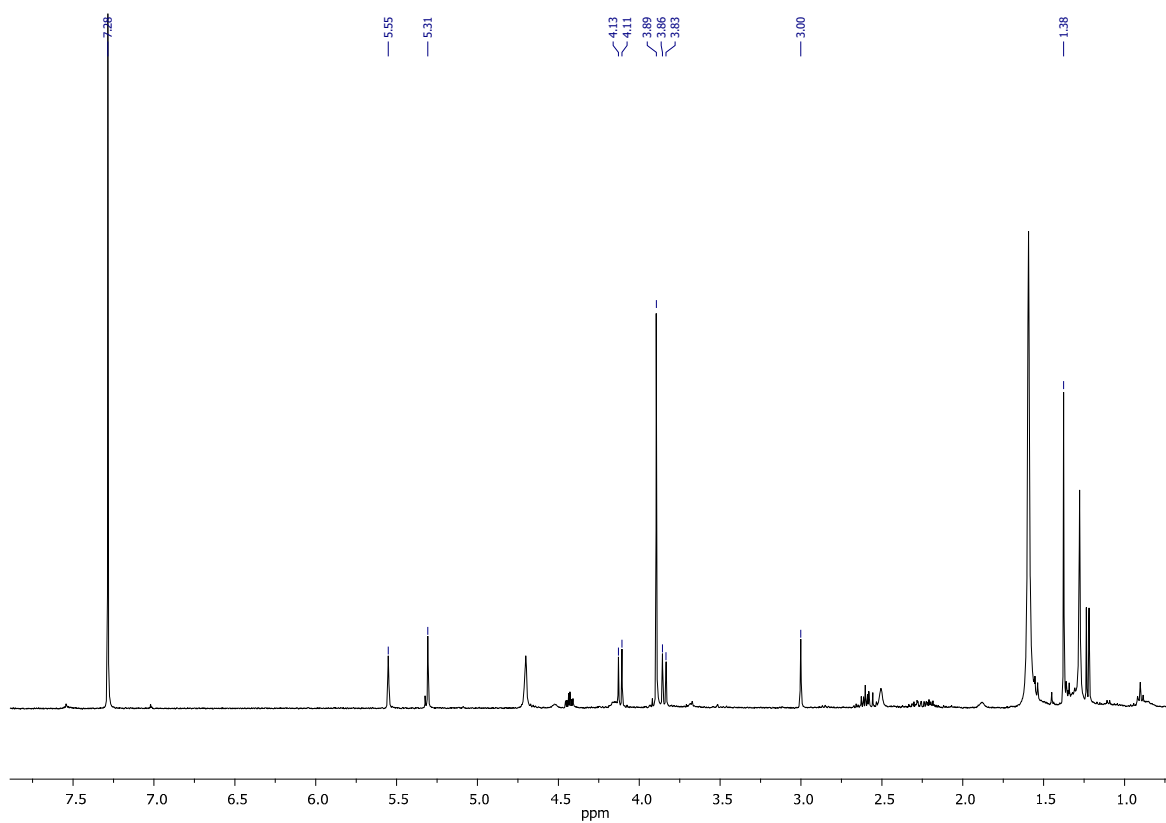

**Figure S28.**  $^1\text{H}$  NMR spectrum of nigrosporione A (**6**) recorded at 400 MHz in  $\text{CDCl}_3$ .

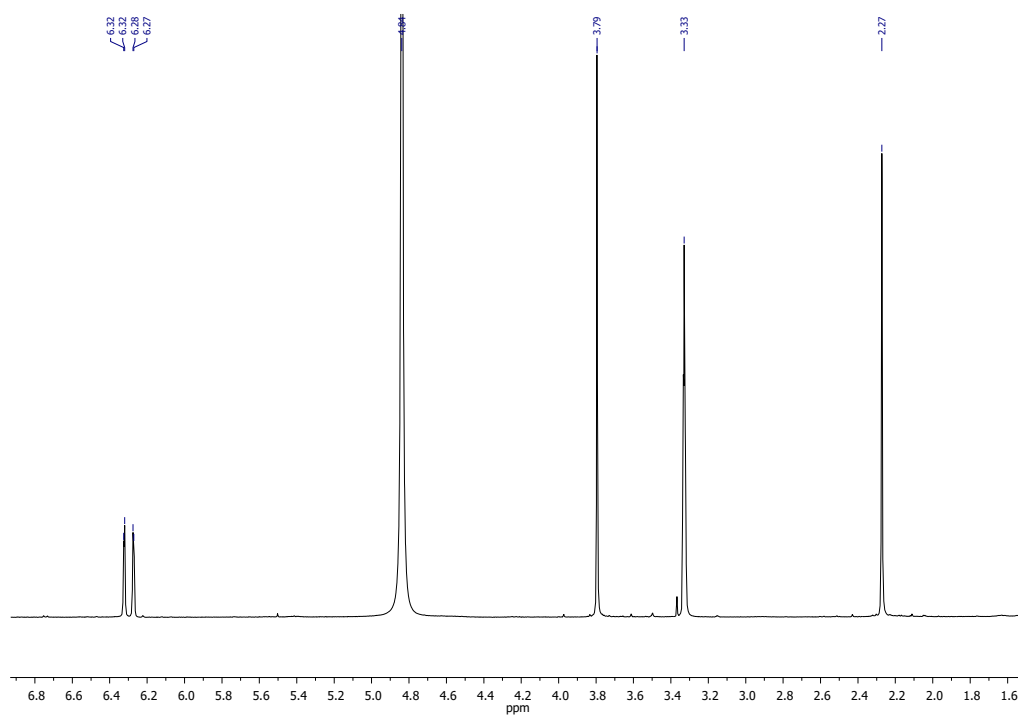

**Figure S29.**  $^1\text{H}$  NMR spectrum of 2,4-dihydroxy-6-methoxyacetophenone (**7**) recorded at 400 MHz in  $\text{CD}_3\text{OD}$ .

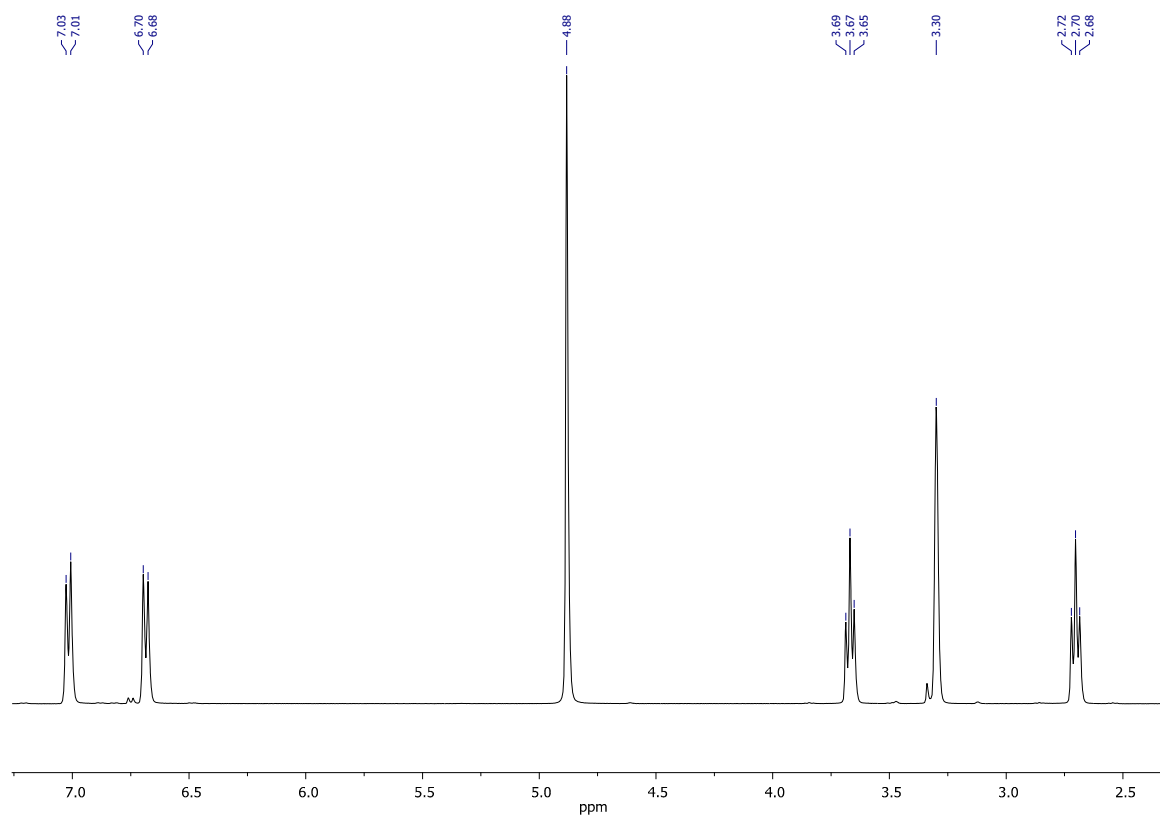

**Figure S30.**  $^1\text{H}$  NMR spectrum of tyrosol (**8**) recorded at 400 MHz in  $\text{CD}_3\text{OD}$ .

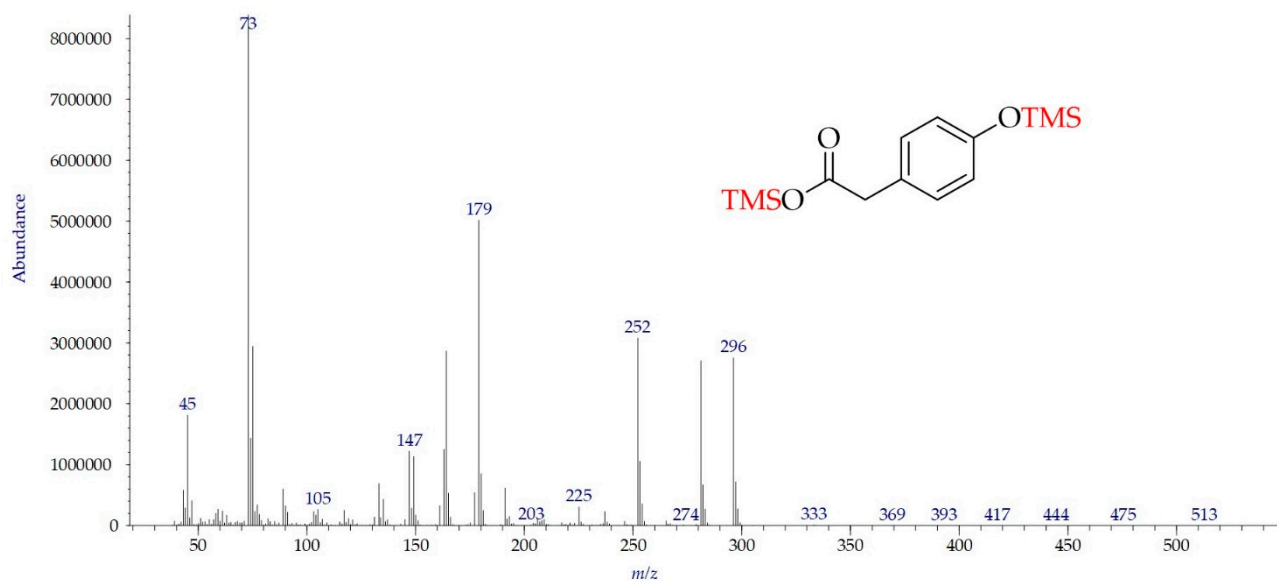

**Figure S31.** EI mass spectrum at 70 eV of 4-hydroxyphenylacetic acid (9), 2TMS (RI = 1581). TMS = trimethylsilyl group.

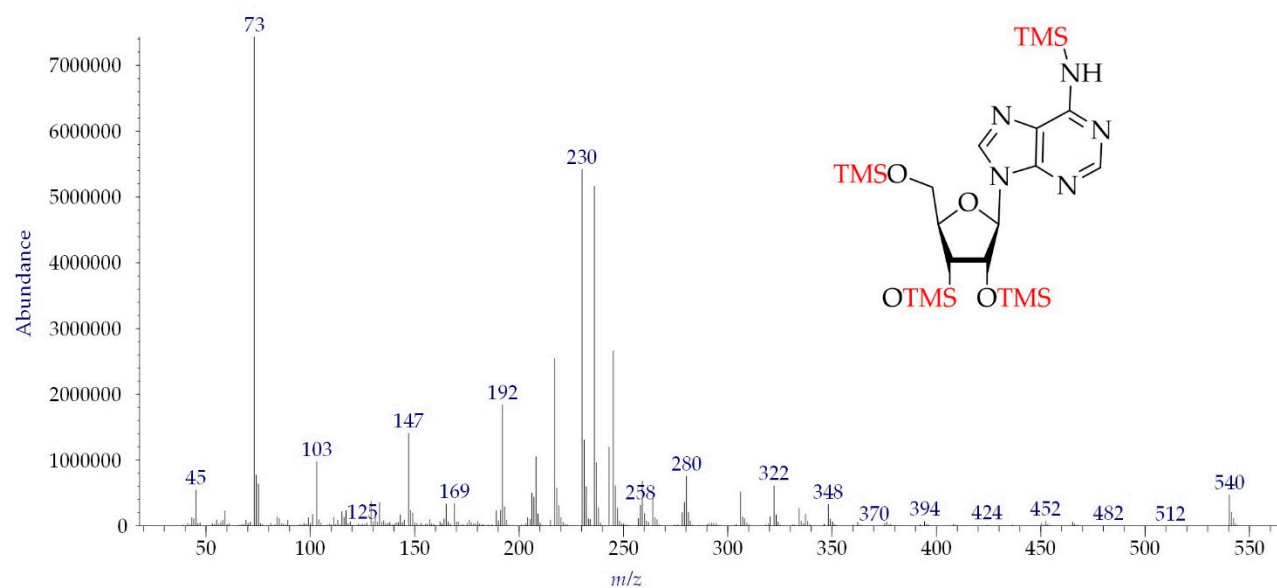

**Figure S32.** EI mass spectrum at 70 eV of adenosine (10), 4TMS (RI = 2670). TMS = trimethylsilyl group.





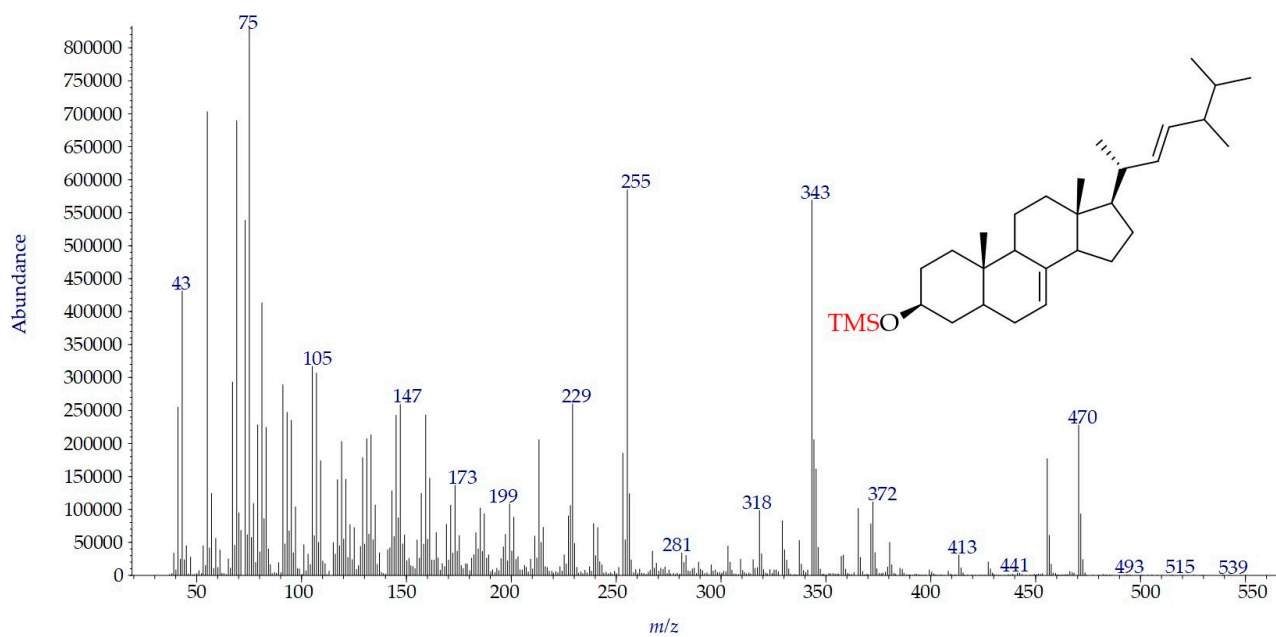

**Figure S37.** EI mass spectrum at 70 eV of ergosta-7,22-dien-3-ol (15), TMS (RI = 2589). TMS = trimethylsilyl group.
